# Supplementary material
Source: publisher figshare collection journal article supplement (https://rs.figshare.com/ndownloader/files/16452917)
Supplement: Supplementary file 1 [file 16452917]

**Table S1. Summary of the outcomes of the feeding tests.**

|  |  | **Number of tests with this outcome / Total number of tests** | |
| --- | --- | --- | --- |
| **Season** | **Outcome of the tests** | **Females** | **Males** |
| Early dry season | Both food items eaten, NC first | 51 / 90 | 47 / 162 |
| Both food items eaten, C first | 3 / 90 | 51 / 162 |
| Only NC food item eaten | 29 / 90 | 55 / 162 |
| Only C food item eaten | 3 / 90 | 5 / 162 |
| No food item eaten  (tests not included in the models) | 4 / 90 | 4 / 162 |
| Late dry season | Both food items eaten, NC first | 12 / 99 | 70 / 125 |
| Both food items eaten, C first | 3 /99 | 55 / 125 |
| Only NC food item eaten | 71 / 99 | 11 / 125 |
| Only C food item eaten | 8 / 99 | 2 / 125 |
| No food item eaten  (tests not included in the models) | 5 / 99 | 6 / 125 |

**Table S2. Likelihood ratio tests comparing models with and without the interaction between season and subject’s sex.**

| Model | ΔLogLik | Δdf | *X*2 | P|>*X*2| |
| --- | --- | --- | --- | --- |
| 1. Avoiding C food | **5.37** | **1** | **10.72** | **0.001** |
| 2. Eating NC food first | 1.45 | 1 | 2.90 | 0.09 |
| 3. Drinking preference | 0.35 | 1 | 0.71 | 0.40 |
| 4. Sleeping choice | 1.13 | 1 | 2.25 | 0.13 |
| 5. Selective defecation | 0.002 | 1 | 0.005 | 0.94 |
| 6. Hygienic score | 0.43 | 1 | 0.86 | 0.35 |
| 7. Parasite richness (fecal-oral route) | 0.05 | 1 | 0.10 | 0.75 |
| 8. Parasite richness (complex life cycle) | 0.01 | 1 | 0.01 | 0.91 |

To assess the significance of an interaction, we compared the full model including the interaction with the model without the interaction. Bold text denotes cases for which we kept the interaction in the model (when P < 0.10). Significant statistical tests are highlighted in bold (P < 0.05**).**

**Table S3. Feeding responses during feeding tests.**

| Subject | Season | Test Number | Sex | Age Class | Food | Feed | Body Index | Feed First |
| --- | --- | --- | --- | --- | --- | --- | --- | --- |
| 1 | earlydry | 1 | M | adult | C | 1 | 4.383561644 | 1 |
| 1 | earlydry | 1 | M | adult | NC | 1 | 4.383561644 | 0 |
| 1 | earlydry | 2 | M | adult | C | 1 | 4.383561644 | 0 |
| 1 | earlydry | 2 | M | adult | NC | 1 | 4.383561644 | 1 |
| 1 | earlydry | 3 | M | adult | C | 0 | 4.383561644 | NA |
| 1 | earlydry | 3 | M | adult | NC | 0 | 4.383561644 | NA |
| 1 | earlydry | 4 | M | adult | C | 0 | 4.383561644 | NA |
| 1 | earlydry | 4 | M | adult | NC | 1 | 4.383561644 | NA |
| 1 | earlydry | 5 | M | adult | C | 1 | 4.383561644 | 1 |
| 1 | earlydry | 5 | M | adult | NC | 1 | 4.383561644 | 0 |
| 1 | earlydry | 6 | M | adult | C | 0 | 4.383561644 | NA |
| 1 | earlydry | 6 | M | adult | NC | 1 | 4.383561644 | NA |
| 1 | earlydry | 7 | M | adult | C | 0 | 4.383561644 | NA |
| 1 | earlydry | 7 | M | adult | NC | 1 | 4.383561644 | NA |
| 1 | earlydry | 8 | M | adult | C | 1 | 4.383561644 | 0 |
| 1 | earlydry | 8 | M | adult | NC | 1 | 4.383561644 | 1 |
| 1 | earlydry | 9 | M | adult | C | 0 | 4.383561644 | NA |
| 1 | earlydry | 9 | M | adult | NC | 0 | 4.383561644 | NA |
| 2 | latedry | 1 | F | adult | C | 1 | 4.158415842 | 0 |
| 2 | latedry | 1 | F | adult | NC | 1 | 4.158415842 | 1 |
| 2 | latedry | 2 | F | adult | C | 1 | 4.158415842 | 0 |
| 2 | latedry | 2 | F | adult | NC | 1 | 4.158415842 | 1 |
| 2 | latedry | 3 | F | adult | C | 0 | 4.158415842 | NA |
| 2 | latedry | 3 | F | adult | NC | 1 | 4.158415842 | NA |
| 2 | latedry | 4 | F | adult | C | 1 | 4.158415842 | 0 |
| 2 | latedry | 4 | F | adult | NC | 1 | 4.158415842 | 1 |
| 2 | latedry | 5 | F | adult | C | 0 | 4.158415842 | NA |
| 2 | latedry | 5 | F | adult | NC | 1 | 4.158415842 | NA |
| 2 | latedry | 6 | F | adult | C | 0 | 4.158415842 | NA |
| 2 | latedry | 6 | F | adult | NC | 1 | 4.158415842 | NA |
| 2 | latedry | 7 | F | adult | C | 1 | 4.158415842 | 0 |
| 2 | latedry | 7 | F | adult | NC | 1 | 4.158415842 | 1 |
| 2 | latedry | 8 | F | adult | C | 0 | 4.158415842 | NA |
| 2 | latedry | 8 | F | adult | NC | 1 | 4.158415842 | NA |
| 2 | latedry | 9 | F | adult | C | 0 | 4.158415842 | NA |
| 2 | latedry | 9 | F | adult | NC | 1 | 4.158415842 | NA |
| 3 | latedry | 1 | M | adult | C | 1 | 3.243243243 | 1 |
| 3 | latedry | 1 | M | adult | NC | 1 | 3.243243243 | 0 |
| 3 | latedry | 2 | M | adult | C | 1 | 3.243243243 | 0 |
| 3 | latedry | 2 | M | adult | NC | 1 | 3.243243243 | 1 |
| 3 | latedry | 3 | M | adult | C | 0 | 3.243243243 | NA |
| 3 | latedry | 3 | M | adult | NC | 0 | 3.243243243 | NA |
| 3 | latedry | 4 | M | adult | C | 1 | 3.243243243 | NA |
| 3 | latedry | 4 | M | adult | NC | 0 | 3.243243243 | NA |
| 3 | latedry | 5 | M | adult | C | 1 | 3.243243243 | 1 |
| 3 | latedry | 5 | M | adult | NC | 1 | 3.243243243 | 0 |
| 3 | latedry | 6 | M | adult | C | 1 | 3.243243243 | 1 |
| 3 | latedry | 6 | M | adult | NC | 1 | 3.243243243 | 0 |
| 3 | latedry | 7 | M | adult | C | 1 | 3.243243243 | 1 |
| 3 | latedry | 7 | M | adult | NC | 1 | 3.243243243 | 0 |
| 3 | latedry | 8 | M | adult | C | 1 | 3.243243243 | 0 |
| 3 | latedry | 8 | M | adult | NC | 1 | 3.243243243 | 1 |
| 3 | latedry | 9 | M | adult | C | 1 | 3.243243243 | 0 |
| 3 | latedry | 9 | M | adult | NC | 1 | 3.243243243 | 1 |
| 4 | latedry | 1 | M | adult | C | 1 | 3.363636364 | 0 |
| 4 | latedry | 1 | M | adult | NC | 1 | 3.363636364 | 1 |
| 4 | latedry | 2 | M | adult | C | 1 | 3.363636364 | 0 |
| 4 | latedry | 2 | M | adult | NC | 1 | 3.363636364 | 1 |
| 4 | latedry | 3 | M | adult | C | 1 | 3.363636364 | 1 |
| 4 | latedry | 3 | M | adult | NC | 1 | 3.363636364 | 0 |
| 4 | latedry | 4 | M | adult | C | 1 | 3.363636364 | 0 |
| 4 | latedry | 4 | M | adult | NC | 1 | 3.363636364 | 1 |
| 4 | latedry | 5 | M | adult | C | 1 | 3.363636364 | 0 |
| 4 | latedry | 5 | M | adult | NC | 1 | 3.363636364 | 1 |
| 4 | latedry | 6 | M | adult | C | 1 | 3.363636364 | 1 |
| 4 | latedry | 6 | M | adult | NC | 1 | 3.363636364 | 0 |
| 4 | latedry | 7 | M | adult | C | 1 | 3.363636364 | 1 |
| 4 | latedry | 7 | M | adult | NC | 1 | 3.363636364 | 0 |
| 4 | latedry | 8 | M | adult | C | 1 | 3.363636364 | 0 |
| 4 | latedry | 8 | M | adult | NC | 1 | 3.363636364 | 1 |
| 4 | latedry | 9 | M | adult | C | 1 | 3.363636364 | 0 |
| 4 | latedry | 9 | M | adult | NC | 1 | 3.363636364 | 1 |
| 5 | latedry | 1 | M | adult | C | 1 | 3.105022831 | 0 |
| 5 | latedry | 1 | M | adult | NC | 1 | 3.105022831 | 1 |
| 5 | latedry | 2 | M | adult | C | 1 | 3.105022831 | 1 |
| 5 | latedry | 2 | M | adult | NC | 1 | 3.105022831 | 0 |
| 5 | latedry | 3 | M | adult | C | 1 | 3.105022831 | 0 |
| 5 | latedry | 3 | M | adult | NC | 1 | 3.105022831 | 1 |
| 5 | latedry | 4 | M | adult | C | 1 | 3.105022831 | 1 |
| 5 | latedry | 4 | M | adult | NC | 1 | 3.105022831 | 0 |
| 5 | latedry | 5 | M | adult | C | 1 | 3.105022831 | 0 |
| 5 | latedry | 5 | M | adult | NC | 1 | 3.105022831 | 1 |
| 5 | latedry | 6 | M | adult | C | 1 | 3.105022831 | 0 |
| 5 | latedry | 6 | M | adult | NC | 1 | 3.105022831 | 1 |
| 5 | latedry | 7 | M | adult | C | 1 | 3.105022831 | 0 |
| 5 | latedry | 7 | M | adult | NC | 1 | 3.105022831 | 1 |
| 5 | latedry | 8 | M | adult | C | 1 | 3.105022831 | 1 |
| 5 | latedry | 8 | M | adult | NC | 1 | 3.105022831 | 0 |
| 5 | latedry | 9 | M | adult | C | 1 | 3.105022831 | 0 |
| 5 | latedry | 9 | M | adult | NC | 1 | 3.105022831 | 1 |
| 6 | earlydry | 1 | F | adult | C | 0 | 4.681818182 | NA |
| 6 | earlydry | 1 | F | adult | NC | 1 | 4.681818182 | NA |
| 6 | earlydry | 2 | F | adult | C | 1 | 4.681818182 | 0 |
| 6 | earlydry | 2 | F | adult | NC | 1 | 4.681818182 | 1 |
| 6 | earlydry | 3 | F | adult | C | 0 | 4.681818182 | NA |
| 6 | earlydry | 3 | F | adult | NC | 1 | 4.681818182 | NA |
| 6 | earlydry | 4 | F | adult | C | 0 | 4.681818182 | NA |
| 6 | earlydry | 4 | F | adult | NC | 1 | 4.681818182 | NA |
| 6 | earlydry | 5 | F | adult | C | 1 | 4.681818182 | 0 |
| 6 | earlydry | 5 | F | adult | NC | 1 | 4.681818182 | 1 |
| 6 | earlydry | 6 | F | adult | C | 1 | 4.681818182 | 0 |
| 6 | earlydry | 6 | F | adult | NC | 1 | 4.681818182 | 1 |
| 6 | earlydry | 7 | F | adult | C | 0 | 4.681818182 | NA |
| 6 | earlydry | 7 | F | adult | NC | 1 | 4.681818182 | NA |
| 6 | earlydry | 8 | F | adult | C | 0 | 4.681818182 | NA |
| 6 | earlydry | 8 | F | adult | NC | 1 | 4.681818182 | NA |
| 6 | earlydry | 9 | F | adult | C | 0 | 4.681818182 | NA |
| 6 | earlydry | 9 | F | adult | NC | 1 | 4.681818182 | NA |
| 7 | earlydry | 1 | M | adult | C | 0 | 2.624434389 | NA |
| 7 | earlydry | 1 | M | adult | NC | 1 | 2.624434389 | NA |
| 7 | earlydry | 2 | M | adult | C | 1 | 2.624434389 | NA |
| 7 | earlydry | 2 | M | adult | NC | 0 | 2.624434389 | NA |
| 7 | earlydry | 3 | M | adult | C | 0 | 2.624434389 | NA |
| 7 | earlydry | 3 | M | adult | NC | 1 | 2.624434389 | NA |
| 7 | earlydry | 4 | M | adult | C | 0 | 2.624434389 | NA |
| 7 | earlydry | 4 | M | adult | NC | 1 | 2.624434389 | NA |
| 7 | earlydry | 5 | M | adult | C | 0 | 2.624434389 | NA |
| 7 | earlydry | 5 | M | adult | NC | 1 | 2.624434389 | NA |
| 7 | earlydry | 6 | M | adult | C | 0 | 2.624434389 | NA |
| 7 | earlydry | 6 | M | adult | NC | 1 | 2.624434389 | NA |
| 7 | earlydry | 7 | M | adult | C | 0 | 2.624434389 | NA |
| 7 | earlydry | 7 | M | adult | NC | 1 | 2.624434389 | NA |
| 7 | earlydry | 8 | M | adult | C | 0 | 2.624434389 | NA |
| 7 | earlydry | 8 | M | adult | NC | 1 | 2.624434389 | NA |
| 7 | earlydry | 9 | M | adult | C | 0 | 2.624434389 | NA |
| 7 | earlydry | 9 | M | adult | NC | 1 | 2.624434389 | NA |
| 8 | latedry | 1 | M | adult | C | 1 | 3.378995434 | 0 |
| 8 | latedry | 1 | M | adult | NC | 1 | 3.378995434 | 1 |
| 8 | latedry | 2 | M | adult | C | 1 | 3.378995434 | 1 |
| 8 | latedry | 2 | M | adult | NC | 1 | 3.378995434 | 0 |
| 8 | latedry | 3 | M | adult | C | 1 | 3.378995434 | 1 |
| 8 | latedry | 3 | M | adult | NC | 1 | 3.378995434 | 0 |
| 8 | latedry | 4 | M | adult | C | 1 | 3.378995434 | 1 |
| 8 | latedry | 4 | M | adult | NC | 1 | 3.378995434 | 0 |
| 8 | latedry | 5 | M | adult | C | 1 | 3.378995434 | 0 |
| 8 | latedry | 5 | M | adult | NC | 1 | 3.378995434 | 1 |
| 8 | latedry | 6 | M | adult | C | 1 | 3.378995434 | 0 |
| 8 | latedry | 6 | M | adult | NC | 1 | 3.378995434 | 1 |
| 8 | latedry | 7 | M | adult | C | 1 | 3.378995434 | 0 |
| 8 | latedry | 7 | M | adult | NC | 1 | 3.378995434 | 1 |
| 8 | latedry | 8 | M | adult | C | 1 | 3.378995434 | 1 |
| 8 | latedry | 8 | M | adult | NC | 1 | 3.378995434 | 0 |
| 8 | latedry | 9 | M | adult | C | 1 | 3.378995434 | 1 |
| 8 | latedry | 9 | M | adult | NC | 1 | 3.378995434 | 0 |
| 9 | earlydry | 1 | M | adult | C | 1 | 4.594594595 | 1 |
| 9 | earlydry | 1 | M | adult | NC | 1 | 4.594594595 | 0 |
| 9 | earlydry | 2 | M | adult | C | 0 | 4.594594595 | NA |
| 9 | earlydry | 2 | M | adult | NC | 1 | 4.594594595 | NA |
| 9 | earlydry | 3 | M | adult | C | 1 | 4.594594595 | 0 |
| 9 | earlydry | 3 | M | adult | NC | 1 | 4.594594595 | 1 |
| 9 | earlydry | 4 | M | adult | C | 0 | 4.594594595 | NA |
| 9 | earlydry | 4 | M | adult | NC | 1 | 4.594594595 | NA |
| 9 | earlydry | 5 | M | adult | C | 1 | 4.594594595 | 0 |
| 9 | earlydry | 5 | M | adult | NC | 1 | 4.594594595 | 1 |
| 9 | earlydry | 6 | M | adult | C | 1 | 4.594594595 | 1 |
| 9 | earlydry | 6 | M | adult | NC | 1 | 4.594594595 | 0 |
| 9 | earlydry | 7 | M | adult | C | 1 | 4.594594595 | 1 |
| 9 | earlydry | 7 | M | adult | NC | 1 | 4.594594595 | 0 |
| 9 | earlydry | 8 | M | adult | C | 1 | 4.594594595 | 0 |
| 9 | earlydry | 8 | M | adult | NC | 1 | 4.594594595 | 1 |
| 9 | earlydry | 9 | M | adult | C | 1 | 4.594594595 | 0 |
| 9 | earlydry | 9 | M | adult | NC | 1 | 4.594594595 | 1 |
| 9 | latedry | 1 | M | adult | C | 1 | 3.783783784 | 0 |
| 9 | latedry | 1 | M | adult | NC | 1 | 3.783783784 | 1 |
| 9 | latedry | 2 | M | adult | C | 1 | 3.783783784 | 0 |
| 9 | latedry | 2 | M | adult | NC | 1 | 3.783783784 | 1 |
| 9 | latedry | 3 | M | adult | C | 1 | 3.783783784 | 1 |
| 9 | latedry | 3 | M | adult | NC | 1 | 3.783783784 | 0 |
| 9 | latedry | 4 | M | adult | C | 1 | 3.783783784 | 1 |
| 9 | latedry | 4 | M | adult | NC | 1 | 3.783783784 | 0 |
| 9 | latedry | 5 | M | adult | C | 1 | 3.783783784 | 0 |
| 9 | latedry | 5 | M | adult | NC | 1 | 3.783783784 | 1 |
| 9 | latedry | 6 | M | adult | C | 1 | 3.783783784 | 0 |
| 9 | latedry | 6 | M | adult | NC | 1 | 3.783783784 | 1 |
| 9 | latedry | 7 | M | adult | C | 1 | 3.783783784 | 1 |
| 9 | latedry | 7 | M | adult | NC | 1 | 3.783783784 | 0 |
| 9 | latedry | 8 | M | adult | C | 1 | 3.783783784 | 0 |
| 9 | latedry | 8 | M | adult | NC | 1 | 3.783783784 | 1 |
| 9 | latedry | 9 | M | adult | C | 1 | 3.783783784 | 1 |
| 9 | latedry | 9 | M | adult | NC | 1 | 3.783783784 | 0 |
| 10 | earlydry | 1 | M | juvenile | C | 1 | 2.31884058 | 0 |
| 10 | earlydry | 1 | M | juvenile | NC | 1 | 2.31884058 | 1 |
| 10 | earlydry | 2 | M | juvenile | C | 1 | 2.31884058 | 0 |
| 10 | earlydry | 2 | M | juvenile | NC | 1 | 2.31884058 | 1 |
| 10 | earlydry | 3 | M | juvenile | C | 1 | 2.31884058 | 1 |
| 10 | earlydry | 3 | M | juvenile | NC | 1 | 2.31884058 | 0 |
| 10 | earlydry | 4 | M | juvenile | C | 0 | 2.31884058 | NA |
| 10 | earlydry | 4 | M | juvenile | NC | 1 | 2.31884058 | NA |
| 10 | earlydry | 5 | M | juvenile | C | 0 | 2.31884058 | NA |
| 10 | earlydry | 5 | M | juvenile | NC | 1 | 2.31884058 | NA |
| 10 | earlydry | 6 | M | juvenile | C | 1 | 2.31884058 | 1 |
| 10 | earlydry | 6 | M | juvenile | NC | 1 | 2.31884058 | 0 |
| 10 | earlydry | 7 | M | juvenile | C | 1 | 2.31884058 | 1 |
| 10 | earlydry | 7 | M | juvenile | NC | 1 | 2.31884058 | 0 |
| 10 | earlydry | 8 | M | juvenile | C | 1 | 2.31884058 | 1 |
| 10 | earlydry | 8 | M | juvenile | NC | 1 | 2.31884058 | 0 |
| 10 | earlydry | 9 | M | juvenile | C | 1 | 2.31884058 | 1 |
| 10 | earlydry | 9 | M | juvenile | NC | 1 | 2.31884058 | 0 |
| 11 | earlydry | 1 | M | adult | C | 1 | 5.358851675 | 1 |
| 11 | earlydry | 1 | M | adult | NC | 1 | 5.358851675 | 0 |
| 11 | earlydry | 2 | M | adult | C | 1 | 5.358851675 | 0 |
| 11 | earlydry | 2 | M | adult | NC | 1 | 5.358851675 | 1 |
| 11 | earlydry | 3 | M | adult | C | 0 | 5.358851675 | NA |
| 11 | earlydry | 3 | M | adult | NC | 1 | 5.358851675 | NA |
| 11 | earlydry | 4 | M | adult | C | 1 | 5.358851675 | 0 |
| 11 | earlydry | 4 | M | adult | NC | 1 | 5.358851675 | 1 |
| 11 | earlydry | 5 | M | adult | C | 1 | 5.358851675 | 1 |
| 11 | earlydry | 5 | M | adult | NC | 1 | 5.358851675 | 0 |
| 11 | earlydry | 6 | M | adult | C | 0 | 5.358851675 | NA |
| 11 | earlydry | 6 | M | adult | NC | 1 | 5.358851675 | NA |
| 11 | earlydry | 7 | M | adult | C | 1 | 5.358851675 | 0 |
| 11 | earlydry | 7 | M | adult | NC | 1 | 5.358851675 | 1 |
| 11 | earlydry | 8 | M | adult | C | 1 | 5.358851675 | 1 |
| 11 | earlydry | 8 | M | adult | NC | 1 | 5.358851675 | 0 |
| 11 | earlydry | 9 | M | adult | C | 0 | 5.358851675 | NA |
| 11 | earlydry | 9 | M | adult | NC | 1 | 5.358851675 | NA |
| 11 | latedry | 1 | M | adult | C | 1 | 3.636363636 | 0 |
| 11 | latedry | 1 | M | adult | NC | 1 | 3.636363636 | 1 |
| 11 | latedry | 2 | M | adult | C | 1 | 3.636363636 | 0 |
| 11 | latedry | 2 | M | adult | NC | 1 | 3.636363636 | 1 |
| 11 | latedry | 3 | M | adult | C | 1 | 3.636363636 | 1 |
| 11 | latedry | 3 | M | adult | NC | 1 | 3.636363636 | 0 |
| 11 | latedry | 4 | M | adult | C | 1 | 3.636363636 | 0 |
| 11 | latedry | 4 | M | adult | NC | 1 | 3.636363636 | 1 |
| 11 | latedry | 5 | M | adult | C | 1 | 3.636363636 | 1 |
| 11 | latedry | 5 | M | adult | NC | 1 | 3.636363636 | 0 |
| 11 | latedry | 6 | M | adult | C | 1 | 3.636363636 | 0 |
| 11 | latedry | 6 | M | adult | NC | 1 | 3.636363636 | 1 |
| 11 | latedry | 7 | M | adult | C | 1 | 3.636363636 | 0 |
| 11 | latedry | 7 | M | adult | NC | 1 | 3.636363636 | 1 |
| 11 | latedry | 8 | M | adult | C | 1 | 3.636363636 | 1 |
| 11 | latedry | 8 | M | adult | NC | 1 | 3.636363636 | 0 |
| 11 | latedry | 9 | M | adult | C | 1 | 3.636363636 | 1 |
| 11 | latedry | 9 | M | adult | NC | 1 | 3.636363636 | 0 |
| 12 | latedry | 1 | F | adult | C | 0 | 4.239631336 | NA |
| 12 | latedry | 1 | F | adult | NC | 1 | 4.239631336 | NA |
| 12 | latedry | 2 | F | adult | C | 0 | 4.239631336 | NA |
| 12 | latedry | 2 | F | adult | NC | 1 | 4.239631336 | NA |
| 12 | latedry | 3 | F | adult | C | 0 | 4.239631336 | NA |
| 12 | latedry | 3 | F | adult | NC | 1 | 4.239631336 | NA |
| 12 | latedry | 4 | F | adult | C | 0 | 4.239631336 | NA |
| 12 | latedry | 4 | F | adult | NC | 1 | 4.239631336 | NA |
| 12 | latedry | 5 | F | adult | C | 0 | 4.239631336 | NA |
| 12 | latedry | 5 | F | adult | NC | 0 | 4.239631336 | NA |
| 12 | latedry | 6 | F | adult | C | 0 | 4.239631336 | NA |
| 12 | latedry | 6 | F | adult | NC | 1 | 4.239631336 | NA |
| 12 | latedry | 7 | F | adult | C | 0 | 4.239631336 | NA |
| 12 | latedry | 7 | F | adult | NC | 1 | 4.239631336 | NA |
| 12 | latedry | 8 | F | adult | C | 0 | 4.239631336 | NA |
| 12 | latedry | 8 | F | adult | NC | 1 | 4.239631336 | NA |
| 12 | latedry | 9 | F | adult | C | 0 | 4.239631336 | NA |
| 12 | latedry | 9 | F | adult | NC | 1 | 4.239631336 | NA |
| 13 | earlydry | 1 | F | adult | C | 1 | 2.592592593 | NA |
| 13 | earlydry | 1 | F | adult | NC | 0 | 2.592592593 | NA |
| 13 | earlydry | 2 | F | adult | C | 0 | 2.592592593 | NA |
| 13 | earlydry | 2 | F | adult | NC | 1 | 2.592592593 | NA |
| 13 | earlydry | 3 | F | adult | C | 0 | 2.592592593 | NA |
| 13 | earlydry | 3 | F | adult | NC | 1 | 2.592592593 | NA |
| 13 | earlydry | 4 | F | adult | C | 1 | 2.592592593 | 0 |
| 13 | earlydry | 4 | F | adult | NC | 1 | 2.592592593 | 1 |
| 13 | earlydry | 5 | F | adult | C | 1 | 2.592592593 | 0 |
| 13 | earlydry | 5 | F | adult | NC | 1 | 2.592592593 | 1 |
| 13 | earlydry | 6 | F | adult | C | 1 | 2.592592593 | 0 |
| 13 | earlydry | 6 | F | adult | NC | 1 | 2.592592593 | 1 |
| 13 | earlydry | 7 | F | adult | C | 1 | 2.592592593 | 0 |
| 13 | earlydry | 7 | F | adult | NC | 1 | 2.592592593 | 1 |
| 13 | earlydry | 8 | F | adult | C | 1 | 2.592592593 | 0 |
| 13 | earlydry | 8 | F | adult | NC | 1 | 2.592592593 | 1 |
| 13 | earlydry | 9 | F | adult | C | 1 | 2.592592593 | 0 |
| 13 | earlydry | 9 | F | adult | NC | 1 | 2.592592593 | 1 |
| 13 | latedry | 1 | F | adult | C | 1 | 2.777777778 | 0 |
| 13 | latedry | 1 | F | adult | NC | 1 | 2.777777778 | 1 |
| 13 | latedry | 2 | F | adult | C | 1 | 2.777777778 | NA |
| 13 | latedry | 2 | F | adult | NC | 0 | 2.777777778 | NA |
| 13 | latedry | 3 | F | adult | C | 1 | 2.777777778 | NA |
| 13 | latedry | 3 | F | adult | NC | 0 | 2.777777778 | NA |
| 13 | latedry | 4 | F | adult | C | 1 | 2.777777778 | 1 |
| 13 | latedry | 4 | F | adult | NC | 1 | 2.777777778 | 0 |
| 13 | latedry | 5 | F | adult | C | 1 | 2.777777778 | NA |
| 13 | latedry | 5 | F | adult | NC | 0 | 2.777777778 | NA |
| 13 | latedry | 6 | F | adult | C | 1 | 2.777777778 | NA |
| 13 | latedry | 6 | F | adult | NC | 0 | 2.777777778 | NA |
| 13 | latedry | 7 | F | adult | C | 1 | 2.777777778 | 1 |
| 13 | latedry | 7 | F | adult | NC | 1 | 2.777777778 | 0 |
| 13 | latedry | 8 | F | adult | C | 1 | 2.777777778 | NA |
| 13 | latedry | 8 | F | adult | NC | 0 | 2.777777778 | NA |
| 13 | latedry | 9 | F | adult | C | 1 | 2.777777778 | NA |
| 13 | latedry | 9 | F | adult | NC | 0 | 2.777777778 | NA |
| 14 | earlydry | 1 | F | juvenile | C | 0 | 2.786069652 | NA |
| 14 | earlydry | 1 | F | juvenile | NC | 1 | 2.786069652 | NA |
| 14 | earlydry | 2 | F | juvenile | C | 0 | 2.786069652 | NA |
| 14 | earlydry | 2 | F | juvenile | NC | 1 | 2.786069652 | NA |
| 14 | earlydry | 3 | F | juvenile | C | 1 | 2.786069652 | NA |
| 14 | earlydry | 3 | F | juvenile | NC | 0 | 2.786069652 | NA |
| 14 | earlydry | 4 | F | juvenile | C | 0 | 2.786069652 | NA |
| 14 | earlydry | 4 | F | juvenile | NC | 1 | 2.786069652 | NA |
| 14 | earlydry | 5 | F | juvenile | C | 1 | 2.786069652 | 0 |
| 14 | earlydry | 5 | F | juvenile | NC | 1 | 2.786069652 | 1 |
| 14 | earlydry | 6 | F | juvenile | C | 1 | 2.786069652 | 0 |
| 14 | earlydry | 6 | F | juvenile | NC | 1 | 2.786069652 | 1 |
| 14 | earlydry | 7 | F | juvenile | C | 1 | 2.786069652 | 0 |
| 14 | earlydry | 7 | F | juvenile | NC | 1 | 2.786069652 | 1 |
| 14 | earlydry | 8 | F | juvenile | C | 0 | 2.786069652 | NA |
| 14 | earlydry | 8 | F | juvenile | NC | 1 | 2.786069652 | NA |
| 14 | earlydry | 9 | F | juvenile | C | 1 | 2.786069652 | 0 |
| 14 | earlydry | 9 | F | juvenile | NC | 1 | 2.786069652 | 1 |
| 15 | earlydry | 1 | M | juvenile | C | 1 | 2.536585366 | 1 |
| 15 | earlydry | 1 | M | juvenile | NC | 1 | 2.536585366 | 0 |
| 15 | earlydry | 2 | M | juvenile | C | 1 | 2.536585366 | 0 |
| 15 | earlydry | 2 | M | juvenile | NC | 1 | 2.536585366 | 1 |
| 15 | earlydry | 3 | M | juvenile | C | 0 | 2.536585366 | NA |
| 15 | earlydry | 3 | M | juvenile | NC | 1 | 2.536585366 | NA |
| 15 | earlydry | 4 | M | juvenile | C | 1 | 2.536585366 | 0 |
| 15 | earlydry | 4 | M | juvenile | NC | 1 | 2.536585366 | 1 |
| 15 | earlydry | 5 | M | juvenile | C | 1 | 2.536585366 | 0 |
| 15 | earlydry | 5 | M | juvenile | NC | 1 | 2.536585366 | 1 |
| 15 | earlydry | 6 | M | juvenile | C | 0 | 2.536585366 | NA |
| 15 | earlydry | 6 | M | juvenile | NC | 1 | 2.536585366 | NA |
| 15 | earlydry | 7 | M | juvenile | C | 1 | 2.536585366 | 1 |
| 15 | earlydry | 7 | M | juvenile | NC | 1 | 2.536585366 | 0 |
| 15 | earlydry | 8 | M | juvenile | C | 1 | 2.536585366 | 1 |
| 15 | earlydry | 8 | M | juvenile | NC | 1 | 2.536585366 | 0 |
| 15 | earlydry | 9 | M | juvenile | C | 0 | 2.536585366 | NA |
| 15 | earlydry | 9 | M | juvenile | NC | 1 | 2.536585366 | NA |
| 16 | earlydry | 1 | M | juvenile | C | 1 | 2.36453202 | 1 |
| 16 | earlydry | 1 | M | juvenile | NC | 1 | 2.36453202 | 0 |
| 16 | earlydry | 2 | M | juvenile | C | 1 | 2.36453202 | 1 |
| 16 | earlydry | 2 | M | juvenile | NC | 1 | 2.36453202 | 0 |
| 16 | earlydry | 3 | M | juvenile | C | 1 | 2.36453202 | 1 |
| 16 | earlydry | 3 | M | juvenile | NC | 1 | 2.36453202 | 0 |
| 16 | earlydry | 4 | M | juvenile | C | 1 | 2.36453202 | 0 |
| 16 | earlydry | 4 | M | juvenile | NC | 1 | 2.36453202 | 1 |
| 16 | earlydry | 5 | M | juvenile | C | 1 | 2.36453202 | NA |
| 16 | earlydry | 5 | M | juvenile | NC | 0 | 2.36453202 | NA |
| 16 | earlydry | 6 | M | juvenile | C | 1 | 2.36453202 | 0 |
| 16 | earlydry | 6 | M | juvenile | NC | 1 | 2.36453202 | 1 |
| 16 | earlydry | 7 | M | juvenile | C | 1 | 2.36453202 | 0 |
| 16 | earlydry | 7 | M | juvenile | NC | 1 | 2.36453202 | 1 |
| 16 | earlydry | 8 | M | juvenile | C | 1 | 2.36453202 | 0 |
| 16 | earlydry | 8 | M | juvenile | NC | 1 | 2.36453202 | 1 |
| 16 | earlydry | 9 | M | juvenile | C | 1 | 2.36453202 | 1 |
| 16 | earlydry | 9 | M | juvenile | NC | 1 | 2.36453202 | 0 |
| 16 | latedry | 1 | M | juvenile | C | 1 | 2.955665025 | 0 |
| 16 | latedry | 1 | M | juvenile | NC | 1 | 2.955665025 | 1 |
| 16 | latedry | 2 | M | juvenile | C | 1 | 2.955665025 | 0 |
| 16 | latedry | 2 | M | juvenile | NC | 1 | 2.955665025 | 1 |
| 16 | latedry | 3 | M | juvenile | C | 1 | 2.955665025 | 1 |
| 16 | latedry | 3 | M | juvenile | NC | 1 | 2.955665025 | 0 |
| 16 | latedry | 4 | M | juvenile | C | 1 | 2.955665025 | 1 |
| 16 | latedry | 4 | M | juvenile | NC | 1 | 2.955665025 | 0 |
| 16 | latedry | 5 | M | juvenile | C | 1 | 2.955665025 | 0 |
| 16 | latedry | 5 | M | juvenile | NC | 1 | 2.955665025 | 1 |
| 16 | latedry | 6 | M | juvenile | C | 0 | 2.955665025 | NA |
| 16 | latedry | 6 | M | juvenile | NC | 1 | 2.955665025 | NA |
| 16 | latedry | 7 | M | juvenile | C | 0 | 2.955665025 | NA |
| 16 | latedry | 7 | M | juvenile | NC | 1 | 2.955665025 | NA |
| 16 | latedry | 8 | M | juvenile | C | 1 | 2.955665025 | 0 |
| 16 | latedry | 8 | M | juvenile | NC | 1 | 2.955665025 | 1 |
| 16 | latedry | 9 | M | juvenile | C | 1 | 2.955665025 | 1 |
| 16 | latedry | 9 | M | juvenile | NC | 1 | 2.955665025 | 0 |
| 17 | earlydry | 1 | M | juvenile | C | 0 | 2.629107981 | NA |
| 17 | earlydry | 1 | M | juvenile | NC | 1 | 2.629107981 | NA |
| 17 | earlydry | 2 | M | juvenile | C | 1 | 2.629107981 | 0 |
| 17 | earlydry | 2 | M | juvenile | NC | 1 | 2.629107981 | 1 |
| 17 | earlydry | 3 | M | juvenile | C | 1 | 2.629107981 | NA |
| 17 | earlydry | 3 | M | juvenile | NC | 0 | 2.629107981 | NA |
| 17 | earlydry | 4 | M | juvenile | C | 1 | 2.629107981 | NA |
| 17 | earlydry | 4 | M | juvenile | NC | 0 | 2.629107981 | NA |
| 17 | earlydry | 5 | M | juvenile | C | 0 | 2.629107981 | NA |
| 17 | earlydry | 5 | M | juvenile | NC | 1 | 2.629107981 | NA |
| 17 | earlydry | 6 | M | juvenile | C | 1 | 2.629107981 | NA |
| 17 | earlydry | 6 | M | juvenile | NC | 0 | 2.629107981 | NA |
| 17 | earlydry | 7 | M | juvenile | C | 0 | 2.629107981 | NA |
| 17 | earlydry | 7 | M | juvenile | NC | 1 | 2.629107981 | NA |
| 17 | earlydry | 8 | M | juvenile | C | 0 | 2.629107981 | NA |
| 17 | earlydry | 8 | M | juvenile | NC | 1 | 2.629107981 | NA |
| 17 | earlydry | 9 | M | juvenile | C | 0 | 2.629107981 | NA |
| 17 | earlydry | 9 | M | juvenile | NC | 1 | 2.629107981 | NA |
| 17 | latedry | 1 | M | juvenile | C | 1 | 3.38028169 | 1 |
| 17 | latedry | 1 | M | juvenile | NC | 1 | 3.38028169 | 0 |
| 17 | latedry | 2 | M | juvenile | C | 0 | 3.38028169 | NA |
| 17 | latedry | 2 | M | juvenile | NC | 0 | 3.38028169 | NA |
| 17 | latedry | 3 | M | juvenile | C | 0 | 3.38028169 | NA |
| 17 | latedry | 3 | M | juvenile | NC | 0 | 3.38028169 | NA |
| 17 | latedry | 4 | M | juvenile | C | 1 | 3.38028169 | NA |
| 17 | latedry | 4 | M | juvenile | NC | 0 | 3.38028169 | NA |
| 17 | latedry | 5 | M | juvenile | C | 1 | 3.38028169 | 0 |
| 17 | latedry | 5 | M | juvenile | NC | 1 | 3.38028169 | 1 |
| 17 | latedry | 6 | M | juvenile | C | 0 | 3.38028169 | NA |
| 17 | latedry | 6 | M | juvenile | NC | 0 | 3.38028169 | NA |
| 17 | latedry | 7 | M | juvenile | C | 1 | 3.38028169 | 0 |
| 17 | latedry | 7 | M | juvenile | NC | 1 | 3.38028169 | 1 |
| 17 | latedry | 8 | M | juvenile | C | 1 | 3.38028169 | 0 |
| 17 | latedry | 8 | M | juvenile | NC | 1 | 3.38028169 | 1 |
| 17 | latedry | 9 | M | juvenile | C | 0 | 3.38028169 | NA |
| 17 | latedry | 9 | M | juvenile | NC | 0 | 3.38028169 | NA |
| 18 | earlydry | 1 | M | juvenile | C | 1 | 2.156862745 | 1 |
| 18 | earlydry | 1 | M | juvenile | NC | 1 | 2.156862745 | 0 |
| 18 | earlydry | 2 | M | juvenile | C | 1 | 2.156862745 | 0 |
| 18 | earlydry | 2 | M | juvenile | NC | 1 | 2.156862745 | 1 |
| 18 | earlydry | 3 | M | juvenile | C | 1 | 2.156862745 | 0 |
| 18 | earlydry | 3 | M | juvenile | NC | 1 | 2.156862745 | 1 |
| 18 | earlydry | 4 | M | juvenile | C | 1 | 2.156862745 | 1 |
| 18 | earlydry | 4 | M | juvenile | NC | 1 | 2.156862745 | 0 |
| 18 | earlydry | 5 | M | juvenile | C | 1 | 2.156862745 | 0 |
| 18 | earlydry | 5 | M | juvenile | NC | 1 | 2.156862745 | 1 |
| 18 | earlydry | 6 | M | juvenile | C | 1 | 2.156862745 | 0 |
| 18 | earlydry | 6 | M | juvenile | NC | 1 | 2.156862745 | 1 |
| 18 | earlydry | 7 | M | juvenile | C | 1 | 2.156862745 | 1 |
| 18 | earlydry | 7 | M | juvenile | NC | 1 | 2.156862745 | 0 |
| 18 | earlydry | 8 | M | juvenile | C | 0 | 2.156862745 | NA |
| 18 | earlydry | 8 | M | juvenile | NC | 0 | 2.156862745 | NA |
| 18 | earlydry | 9 | M | juvenile | C | 1 | 2.156862745 | 1 |
| 18 | earlydry | 9 | M | juvenile | NC | 1 | 2.156862745 | 0 |
| 19 | latedry | 1 | M | adult | C | 1 | 3.049327354 | 0 |
| 19 | latedry | 1 | M | adult | NC | 1 | 3.049327354 | 1 |
| 19 | latedry | 2 | M | adult | C | 1 | 3.049327354 | 0 |
| 19 | latedry | 2 | M | adult | NC | 1 | 3.049327354 | 1 |
| 19 | latedry | 3 | M | adult | C | 1 | 3.049327354 | 1 |
| 19 | latedry | 3 | M | adult | NC | 1 | 3.049327354 | 0 |
| 19 | latedry | 4 | M | adult | C | 1 | 3.049327354 | 1 |
| 19 | latedry | 4 | M | adult | NC | 1 | 3.049327354 | 0 |
| 19 | latedry | 5 | M | adult | C | 1 | 3.049327354 | 0 |
| 19 | latedry | 5 | M | adult | NC | 1 | 3.049327354 | 1 |
| 19 | latedry | 6 | M | adult | C | 1 | 3.049327354 | 0 |
| 19 | latedry | 6 | M | adult | NC | 1 | 3.049327354 | 1 |
| 19 | latedry | 7 | M | adult | C | 1 | 3.049327354 | 0 |
| 19 | latedry | 7 | M | adult | NC | 1 | 3.049327354 | 1 |
| 19 | latedry | 8 | M | adult | C | 1 | 3.049327354 | 0 |
| 19 | latedry | 8 | M | adult | NC | 1 | 3.049327354 | 1 |
| 19 | latedry | 9 | M | adult | C | 1 | 3.049327354 | 0 |
| 19 | latedry | 9 | M | adult | NC | 1 | 3.049327354 | 1 |
| 20 | latedry | 1 | F | juvenile | C | 0 | 3.054187192 | NA |
| 20 | latedry | 1 | F | juvenile | NC | 1 | 3.054187192 | NA |
| 20 | latedry | 2 | F | juvenile | C | 0 | 3.054187192 | NA |
| 20 | latedry | 2 | F | juvenile | NC | 1 | 3.054187192 | NA |
| 20 | latedry | 3 | F | juvenile | C | 0 | 3.054187192 | NA |
| 20 | latedry | 3 | F | juvenile | NC | 1 | 3.054187192 | NA |
| 20 | latedry | 4 | F | juvenile | C | 0 | 3.054187192 | NA |
| 20 | latedry | 4 | F | juvenile | NC | 1 | 3.054187192 | NA |
| 20 | latedry | 5 | F | juvenile | C | 0 | 3.054187192 | NA |
| 20 | latedry | 5 | F | juvenile | NC | 1 | 3.054187192 | NA |
| 20 | latedry | 6 | F | juvenile | C | 0 | 3.054187192 | NA |
| 20 | latedry | 6 | F | juvenile | NC | 1 | 3.054187192 | NA |
| 20 | latedry | 7 | F | juvenile | C | 0 | 3.054187192 | NA |
| 20 | latedry | 7 | F | juvenile | NC | 1 | 3.054187192 | NA |
| 20 | latedry | 8 | F | juvenile | C | 0 | 3.054187192 | NA |
| 20 | latedry | 8 | F | juvenile | NC | 1 | 3.054187192 | NA |
| 20 | latedry | 9 | F | juvenile | C | 0 | 3.054187192 | NA |
| 20 | latedry | 9 | F | juvenile | NC | 1 | 3.054187192 | NA |
| 21 | latedry | 1 | M | adult | C | 1 | 3.167420814 | 1 |
| 21 | latedry | 1 | M | adult | NC | 1 | 3.167420814 | 0 |
| 21 | latedry | 2 | M | adult | C | 1 | 3.167420814 | 0 |
| 21 | latedry | 2 | M | adult | NC | 1 | 3.167420814 | 1 |
| 21 | latedry | 3 | M | adult | C | 1 | 3.167420814 | 1 |
| 21 | latedry | 3 | M | adult | NC | 1 | 3.167420814 | 0 |
| 21 | latedry | 4 | M | adult | C | 1 | 3.167420814 | 1 |
| 21 | latedry | 4 | M | adult | NC | 1 | 3.167420814 | 0 |
| 21 | latedry | 5 | M | adult | C | 1 | 3.167420814 | 0 |
| 21 | latedry | 5 | M | adult | NC | 1 | 3.167420814 | 1 |
| 21 | latedry | 6 | M | adult | C | 1 | 3.167420814 | 0 |
| 21 | latedry | 6 | M | adult | NC | 1 | 3.167420814 | 1 |
| 21 | latedry | 7 | M | adult | C | 1 | 3.167420814 | 0 |
| 21 | latedry | 7 | M | adult | NC | 1 | 3.167420814 | 1 |
| 21 | latedry | 8 | M | adult | C | 0 | 3.167420814 | NA |
| 21 | latedry | 8 | M | adult | NC | 1 | 3.167420814 | NA |
| 21 | latedry | 9 | M | adult | C | 0 | 3.167420814 | NA |
| 21 | latedry | 9 | M | adult | NC | 1 | 3.167420814 | NA |
| 22 | earlydry | 1 | F | juvenile | C | 1 | 2.31884058 | 0 |
| 22 | earlydry | 1 | F | juvenile | NC | 1 | 2.31884058 | 1 |
| 22 | earlydry | 2 | F | juvenile | C | 1 | 2.31884058 | 0 |
| 22 | earlydry | 2 | F | juvenile | NC | 1 | 2.31884058 | 1 |
| 22 | earlydry | 3 | F | juvenile | C | 1 | 2.31884058 | 0 |
| 22 | earlydry | 3 | F | juvenile | NC | 1 | 2.31884058 | 1 |
| 22 | earlydry | 4 | F | juvenile | C | 1 | 2.31884058 | 0 |
| 22 | earlydry | 4 | F | juvenile | NC | 1 | 2.31884058 | 1 |
| 22 | earlydry | 5 | F | juvenile | C | 1 | 2.31884058 | 0 |
| 22 | earlydry | 5 | F | juvenile | NC | 1 | 2.31884058 | 1 |
| 22 | earlydry | 6 | F | juvenile | C | 1 | 2.31884058 | 0 |
| 22 | earlydry | 6 | F | juvenile | NC | 1 | 2.31884058 | 1 |
| 22 | earlydry | 7 | F | juvenile | C | 1 | 2.31884058 | 0 |
| 22 | earlydry | 7 | F | juvenile | NC | 1 | 2.31884058 | 1 |
| 22 | earlydry | 8 | F | juvenile | C | 1 | 2.31884058 | 0 |
| 22 | earlydry | 8 | F | juvenile | NC | 1 | 2.31884058 | 1 |
| 22 | earlydry | 9 | F | juvenile | C | 1 | 2.31884058 | 0 |
| 22 | earlydry | 9 | F | juvenile | NC | 1 | 2.31884058 | 1 |
| 23 | earlydry | 1 | M | adult | C | 0 | 4.615384615 | NA |
| 23 | earlydry | 1 | M | adult | NC | 1 | 4.615384615 | NA |
| 23 | earlydry | 2 | M | adult | C | 0 | 4.615384615 | NA |
| 23 | earlydry | 2 | M | adult | NC | 1 | 4.615384615 | NA |
| 23 | earlydry | 3 | M | adult | C | 0 | 4.615384615 | NA |
| 23 | earlydry | 3 | M | adult | NC | 1 | 4.615384615 | NA |
| 23 | earlydry | 4 | M | adult | C | 0 | 4.615384615 | NA |
| 23 | earlydry | 4 | M | adult | NC | 1 | 4.615384615 | NA |
| 23 | earlydry | 5 | M | adult | C | 0 | 4.615384615 | NA |
| 23 | earlydry | 5 | M | adult | NC | 1 | 4.615384615 | NA |
| 23 | earlydry | 6 | M | adult | C | 0 | 4.615384615 | NA |
| 23 | earlydry | 6 | M | adult | NC | 1 | 4.615384615 | NA |
| 23 | earlydry | 7 | M | adult | C | 1 | 4.615384615 | 0 |
| 23 | earlydry | 7 | M | adult | NC | 1 | 4.615384615 | 1 |
| 23 | earlydry | 8 | M | adult | C | 0 | 4.615384615 | NA |
| 23 | earlydry | 8 | M | adult | NC | 1 | 4.615384615 | NA |
| 23 | earlydry | 9 | M | adult | C | 0 | 4.615384615 | NA |
| 23 | earlydry | 9 | M | adult | NC | 1 | 4.615384615 | NA |
| 23 | latedry | 1 | M | adult | C | 1 | 2.805429864 | 1 |
| 23 | latedry | 1 | M | adult | NC | 1 | 2.805429864 | 0 |
| 23 | latedry | 2 | M | adult | C | 1 | 2.805429864 | 0 |
| 23 | latedry | 2 | M | adult | NC | 1 | 2.805429864 | 1 |
| 23 | latedry | 3 | M | adult | C | 1 | 2.805429864 | 1 |
| 23 | latedry | 3 | M | adult | NC | 1 | 2.805429864 | 0 |
| 23 | latedry | 4 | M | adult | C | 1 | 2.805429864 | 0 |
| 23 | latedry | 4 | M | adult | NC | 1 | 2.805429864 | 1 |
| 23 | latedry | 5 | M | adult | C | 1 | 2.805429864 | 0 |
| 23 | latedry | 5 | M | adult | NC | 1 | 2.805429864 | 1 |
| 23 | latedry | 6 | M | adult | C | 1 | 2.805429864 | 0 |
| 23 | latedry | 6 | M | adult | NC | 1 | 2.805429864 | 1 |
| 23 | latedry | 7 | M | adult | C | 1 | 2.805429864 | 1 |
| 23 | latedry | 7 | M | adult | NC | 1 | 2.805429864 | 0 |
| 23 | latedry | 8 | M | adult | C | 1 | 2.805429864 | 1 |
| 23 | latedry | 8 | M | adult | NC | 1 | 2.805429864 | 0 |
| 23 | latedry | 9 | M | adult | C | 1 | 2.805429864 | 1 |
| 23 | latedry | 9 | M | adult | NC | 1 | 2.805429864 | 0 |
| 24 | earlydry | 1 | M | juvenile | C | 1 | 2.369668246 | 1 |
| 24 | earlydry | 1 | M | juvenile | NC | 1 | 2.369668246 | 0 |
| 24 | earlydry | 2 | M | juvenile | C | 1 | 2.369668246 | 0 |
| 24 | earlydry | 2 | M | juvenile | NC | 1 | 2.369668246 | 1 |
| 24 | earlydry | 3 | M | juvenile | C | 0 | 2.369668246 | NA |
| 24 | earlydry | 3 | M | juvenile | NC | 1 | 2.369668246 | NA |
| 24 | earlydry | 4 | M | juvenile | C | 1 | 2.369668246 | 1 |
| 24 | earlydry | 4 | M | juvenile | NC | 1 | 2.369668246 | 0 |
| 24 | earlydry | 5 | M | juvenile | C | 1 | 2.369668246 | 1 |
| 24 | earlydry | 5 | M | juvenile | NC | 1 | 2.369668246 | 0 |
| 24 | earlydry | 6 | M | juvenile | C | 0 | 2.369668246 | NA |
| 24 | earlydry | 6 | M | juvenile | NC | 1 | 2.369668246 | NA |
| 24 | earlydry | 7 | M | juvenile | C | 1 | 2.369668246 | 1 |
| 24 | earlydry | 7 | M | juvenile | NC | 1 | 2.369668246 | 0 |
| 24 | earlydry | 8 | M | juvenile | C | 1 | 2.369668246 | 1 |
| 24 | earlydry | 8 | M | juvenile | NC | 1 | 2.369668246 | 0 |
| 24 | earlydry | 9 | M | juvenile | C | 0 | 2.369668246 | NA |
| 24 | earlydry | 9 | M | juvenile | NC | 1 | 2.369668246 | NA |
| 25 | earlydry | 1 | F | juvenile | C | 1 | 2.322274882 | 0 |
| 25 | earlydry | 1 | F | juvenile | NC | 1 | 2.322274882 | 1 |
| 25 | earlydry | 2 | F | juvenile | C | 1 | 2.322274882 | 0 |
| 25 | earlydry | 2 | F | juvenile | NC | 1 | 2.322274882 | 1 |
| 25 | earlydry | 3 | F | juvenile | C | 0 | 2.322274882 | NA |
| 25 | earlydry | 3 | F | juvenile | NC | 1 | 2.322274882 | NA |
| 25 | earlydry | 4 | F | juvenile | C | 1 | 2.322274882 | 0 |
| 25 | earlydry | 4 | F | juvenile | NC | 1 | 2.322274882 | 1 |
| 25 | earlydry | 5 | F | juvenile | C | 1 | 2.322274882 | 0 |
| 25 | earlydry | 5 | F | juvenile | NC | 1 | 2.322274882 | 1 |
| 25 | earlydry | 6 | F | juvenile | C | 0 | 2.322274882 | NA |
| 25 | earlydry | 6 | F | juvenile | NC | 1 | 2.322274882 | NA |
| 25 | earlydry | 7 | F | juvenile | C | 0 | 2.322274882 | NA |
| 25 | earlydry | 7 | F | juvenile | NC | 0 | 2.322274882 | NA |
| 25 | earlydry | 8 | F | juvenile | C | 1 | 2.322274882 | 1 |
| 25 | earlydry | 8 | F | juvenile | NC | 1 | 2.322274882 | 0 |
| 25 | earlydry | 9 | F | juvenile | C | 1 | 2.322274882 | 0 |
| 25 | earlydry | 9 | F | juvenile | NC | 1 | 2.322274882 | 1 |
| 26 | earlydry | 1 | F | adult | C | 1 | 3.428571429 | 0 |
| 26 | earlydry | 1 | F | adult | NC | 1 | 3.428571429 | 1 |
| 26 | earlydry | 2 | F | adult | C | 1 | 3.428571429 | 0 |
| 26 | earlydry | 2 | F | adult | NC | 1 | 3.428571429 | 1 |
| 26 | earlydry | 3 | F | adult | C | 0 | 3.428571429 | NA |
| 26 | earlydry | 3 | F | adult | NC | 1 | 3.428571429 | NA |
| 26 | earlydry | 4 | F | adult | C | 1 | 3.428571429 | 0 |
| 26 | earlydry | 4 | F | adult | NC | 1 | 3.428571429 | 1 |
| 26 | earlydry | 5 | F | adult | C | 1 | 3.428571429 | 0 |
| 26 | earlydry | 5 | F | adult | NC | 1 | 3.428571429 | 1 |
| 26 | earlydry | 6 | F | adult | C | 0 | 3.428571429 | NA |
| 26 | earlydry | 6 | F | adult | NC | 1 | 3.428571429 | NA |
| 26 | earlydry | 7 | F | adult | C | 0 | 3.428571429 | NA |
| 26 | earlydry | 7 | F | adult | NC | 1 | 3.428571429 | NA |
| 26 | earlydry | 8 | F | adult | C | 1 | 3.428571429 | 1 |
| 26 | earlydry | 8 | F | adult | NC | 1 | 3.428571429 | 0 |
| 26 | earlydry | 9 | F | adult | C | 1 | 3.428571429 | 0 |
| 26 | earlydry | 9 | F | adult | NC | 1 | 3.428571429 | 1 |
| 27 | latedry | 1 | F | juvenile | C | 0 | 3.28358209 | NA |
| 27 | latedry | 1 | F | juvenile | NC | 1 | 3.28358209 | NA |
| 27 | latedry | 2 | F | juvenile | C | 0 | 3.28358209 | NA |
| 27 | latedry | 2 | F | juvenile | NC | 1 | 3.28358209 | NA |
| 27 | latedry | 3 | F | juvenile | C | 0 | 3.28358209 | NA |
| 27 | latedry | 3 | F | juvenile | NC | 1 | 3.28358209 | NA |
| 27 | latedry | 4 | F | juvenile | C | 0 | 3.28358209 | NA |
| 27 | latedry | 4 | F | juvenile | NC | 1 | 3.28358209 | NA |
| 27 | latedry | 5 | F | juvenile | C | 0 | 3.28358209 | NA |
| 27 | latedry | 5 | F | juvenile | NC | 1 | 3.28358209 | NA |
| 27 | latedry | 6 | F | juvenile | C | 0 | 3.28358209 | NA |
| 27 | latedry | 6 | F | juvenile | NC | 1 | 3.28358209 | NA |
| 27 | latedry | 7 | F | juvenile | C | 0 | 3.28358209 | NA |
| 27 | latedry | 7 | F | juvenile | NC | 1 | 3.28358209 | NA |
| 27 | latedry | 8 | F | juvenile | C | 0 | 3.28358209 | NA |
| 27 | latedry | 8 | F | juvenile | NC | 1 | 3.28358209 | NA |
| 27 | latedry | 9 | F | juvenile | C | 0 | 3.28358209 | NA |
| 27 | latedry | 9 | F | juvenile | NC | 1 | 3.28358209 | NA |
| 28 | earlydry | 1 | M | adult | C | 1 | 3.162790698 | 0 |
| 28 | earlydry | 1 | M | adult | NC | 1 | 3.162790698 | 1 |
| 28 | earlydry | 2 | M | adult | C | 1 | 3.162790698 | 0 |
| 28 | earlydry | 2 | M | adult | NC | 1 | 3.162790698 | 1 |
| 28 | earlydry | 3 | M | adult | C | 0 | 3.162790698 | NA |
| 28 | earlydry | 3 | M | adult | NC | 1 | 3.162790698 | NA |
| 28 | earlydry | 4 | M | adult | C | 1 | 3.162790698 | 1 |
| 28 | earlydry | 4 | M | adult | NC | 1 | 3.162790698 | 0 |
| 28 | earlydry | 5 | M | adult | C | 1 | 3.162790698 | 1 |
| 28 | earlydry | 5 | M | adult | NC | 1 | 3.162790698 | 0 |
| 28 | earlydry | 6 | M | adult | C | 0 | 3.162790698 | NA |
| 28 | earlydry | 6 | M | adult | NC | 1 | 3.162790698 | NA |
| 28 | earlydry | 7 | M | adult | C | 1 | 3.162790698 | 0 |
| 28 | earlydry | 7 | M | adult | NC | 1 | 3.162790698 | 1 |
| 28 | earlydry | 8 | M | adult | C | 1 | 3.162790698 | 0 |
| 28 | earlydry | 8 | M | adult | NC | 1 | 3.162790698 | 1 |
| 28 | earlydry | 9 | M | adult | C | 0 | 3.162790698 | NA |
| 28 | earlydry | 9 | M | adult | NC | 1 | 3.162790698 | NA |
| 29 | latedry | 1 | F | juvenile | C | 0 | 2.741116751 | NA |
| 29 | latedry | 1 | F | juvenile | NC | 0 | 2.741116751 | NA |
| 29 | latedry | 2 | F | juvenile | C | 0 | 2.741116751 | NA |
| 29 | latedry | 2 | F | juvenile | NC | 0 | 2.741116751 | NA |
| 29 | latedry | 3 | F | juvenile | C | 0 | 2.741116751 | NA |
| 29 | latedry | 3 | F | juvenile | NC | 0 | 2.741116751 | NA |
| 29 | latedry | 4 | F | juvenile | C | 1 | 2.741116751 | NA |
| 29 | latedry | 4 | F | juvenile | NC | 0 | 2.741116751 | NA |
| 29 | latedry | 5 | F | juvenile | C | 0 | 2.741116751 | NA |
| 29 | latedry | 5 | F | juvenile | NC | 1 | 2.741116751 | NA |
| 29 | latedry | 6 | F | juvenile | C | 0 | 2.741116751 | NA |
| 29 | latedry | 6 | F | juvenile | NC | 1 | 2.741116751 | NA |
| 29 | latedry | 7 | F | juvenile | C | 1 | 2.741116751 | 0 |
| 29 | latedry | 7 | F | juvenile | NC | 1 | 2.741116751 | 1 |
| 29 | latedry | 8 | F | juvenile | C | 0 | 2.741116751 | NA |
| 29 | latedry | 8 | F | juvenile | NC | 1 | 2.741116751 | NA |
| 29 | latedry | 9 | F | juvenile | C | 0 | 2.741116751 | NA |
| 29 | latedry | 9 | F | juvenile | NC | 1 | 2.741116751 | NA |
| 30 | earlydry | 1 | F | juvenile | C | 1 | 2.14953271 | 0 |
| 30 | earlydry | 1 | F | juvenile | NC | 1 | 2.14953271 | 1 |
| 30 | earlydry | 2 | F | juvenile | C | 1 | 2.14953271 | 0 |
| 30 | earlydry | 2 | F | juvenile | NC | 1 | 2.14953271 | 1 |
| 30 | earlydry | 3 | F | juvenile | C | 0 | 2.14953271 | NA |
| 30 | earlydry | 3 | F | juvenile | NC | 1 | 2.14953271 | NA |
| 30 | earlydry | 4 | F | juvenile | C | 0 | 2.14953271 | NA |
| 30 | earlydry | 4 | F | juvenile | NC | 1 | 2.14953271 | NA |
| 30 | earlydry | 5 | F | juvenile | C | 0 | 2.14953271 | NA |
| 30 | earlydry | 5 | F | juvenile | NC | 1 | 2.14953271 | NA |
| 30 | earlydry | 6 | F | juvenile | C | 1 | 2.14953271 | 0 |
| 30 | earlydry | 6 | F | juvenile | NC | 1 | 2.14953271 | 1 |
| 30 | earlydry | 7 | F | juvenile | C | 0 | 2.14953271 | NA |
| 30 | earlydry | 7 | F | juvenile | NC | 1 | 2.14953271 | NA |
| 30 | earlydry | 8 | F | juvenile | C | 0 | 2.14953271 | NA |
| 30 | earlydry | 8 | F | juvenile | NC | 0 | 2.14953271 | NA |
| 30 | earlydry | 9 | F | juvenile | C | 0 | 2.14953271 | NA |
| 30 | earlydry | 9 | F | juvenile | NC | 0 | 2.14953271 | NA |
| 30 | latedry | 1 | F | juvenile | C | 1 | 3.271028037 | 0 |
| 30 | latedry | 1 | F | juvenile | NC | 1 | 3.271028037 | 1 |
| 30 | latedry | 2 | F | juvenile | C | 0 | 3.271028037 | NA |
| 30 | latedry | 2 | F | juvenile | NC | 1 | 3.271028037 | NA |
| 30 | latedry | 3 | F | juvenile | C | 0 | 3.271028037 | NA |
| 30 | latedry | 3 | F | juvenile | NC | 1 | 3.271028037 | NA |
| 30 | latedry | 4 | F | juvenile | C | 0 | 3.271028037 | NA |
| 30 | latedry | 4 | F | juvenile | NC | 1 | 3.271028037 | NA |
| 30 | latedry | 5 | F | juvenile | C | 0 | 3.271028037 | NA |
| 30 | latedry | 5 | F | juvenile | NC | 1 | 3.271028037 | NA |
| 30 | latedry | 6 | F | juvenile | C | 0 | 3.271028037 | NA |
| 30 | latedry | 6 | F | juvenile | NC | 1 | 3.271028037 | NA |
| 30 | latedry | 7 | F | juvenile | C | 0 | 3.271028037 | NA |
| 30 | latedry | 7 | F | juvenile | NC | 1 | 3.271028037 | NA |
| 30 | latedry | 8 | F | juvenile | C | 0 | 3.271028037 | NA |
| 30 | latedry | 8 | F | juvenile | NC | 1 | 3.271028037 | NA |
| 30 | latedry | 9 | F | juvenile | C | 0 | 3.271028037 | NA |
| 30 | latedry | 9 | F | juvenile | NC | 1 | 3.271028037 | NA |
| 31 | earlydry | 1 | M | juvenile | C | 1 | 2.412060302 | 1 |
| 31 | earlydry | 1 | M | juvenile | NC | 1 | 2.412060302 | 0 |
| 31 | earlydry | 2 | M | juvenile | C | 1 | 2.412060302 | 0 |
| 31 | earlydry | 2 | M | juvenile | NC | 1 | 2.412060302 | 1 |
| 31 | earlydry | 3 | M | juvenile | C | 1 | 2.412060302 | 1 |
| 31 | earlydry | 3 | M | juvenile | NC | 1 | 2.412060302 | 0 |
| 31 | earlydry | 4 | M | juvenile | C | 1 | 2.412060302 | 0 |
| 31 | earlydry | 4 | M | juvenile | NC | 1 | 2.412060302 | 1 |
| 31 | earlydry | 5 | M | juvenile | C | 1 | 2.412060302 | 1 |
| 31 | earlydry | 5 | M | juvenile | NC | 1 | 2.412060302 | 0 |
| 31 | earlydry | 6 | M | juvenile | C | 1 | 2.412060302 | 0 |
| 31 | earlydry | 6 | M | juvenile | NC | 1 | 2.412060302 | 1 |
| 31 | earlydry | 7 | M | juvenile | C | 1 | 2.412060302 | 1 |
| 31 | earlydry | 7 | M | juvenile | NC | 1 | 2.412060302 | 0 |
| 31 | earlydry | 8 | M | juvenile | C | 1 | 2.412060302 | 1 |
| 31 | earlydry | 8 | M | juvenile | NC | 1 | 2.412060302 | 0 |
| 31 | earlydry | 9 | M | juvenile | C | 1 | 2.412060302 | 0 |
| 31 | earlydry | 9 | M | juvenile | NC | 1 | 2.412060302 | 1 |
| 31 | latedry | 1 | M | juvenile | C | 1 | 3.91959799 | 1 |
| 31 | latedry | 1 | M | juvenile | NC | 1 | 3.91959799 | 0 |
| 31 | latedry | 2 | M | juvenile | C | 1 | 3.91959799 | 1 |
| 31 | latedry | 2 | M | juvenile | NC | 1 | 3.91959799 | 0 |
| 31 | latedry | 3 | M | juvenile | C | 1 | 3.91959799 | 0 |
| 31 | latedry | 3 | M | juvenile | NC | 1 | 3.91959799 | 1 |
| 31 | latedry | 4 | M | juvenile | C | 1 | 3.91959799 | 1 |
| 31 | latedry | 4 | M | juvenile | NC | 1 | 3.91959799 | 0 |
| 31 | latedry | 5 | M | juvenile | C | 1 | 3.91959799 | 0 |
| 31 | latedry | 5 | M | juvenile | NC | 1 | 3.91959799 | 1 |
| 31 | latedry | 6 | M | juvenile | C | 1 | 3.91959799 | 0 |
| 31 | latedry | 6 | M | juvenile | NC | 1 | 3.91959799 | 1 |
| 31 | latedry | 7 | M | juvenile | C | 1 | 3.91959799 | 0 |
| 31 | latedry | 7 | M | juvenile | NC | 1 | 3.91959799 | 1 |
| 31 | latedry | 8 | M | juvenile | C | 0 | 3.91959799 | NA |
| 31 | latedry | 8 | M | juvenile | NC | 1 | 3.91959799 | NA |
| 31 | latedry | 9 | M | juvenile | C | 0 | 3.91959799 | NA |
| 31 | latedry | 9 | M | juvenile | NC | 0 | 3.91959799 | NA |
| 32 | earlydry | 1 | M | adult | C | 1 | 2.465753425 | 0 |
| 32 | earlydry | 1 | M | adult | NC | 1 | 2.465753425 | 1 |
| 32 | earlydry | 2 | M | adult | C | 1 | 2.465753425 | 0 |
| 32 | earlydry | 2 | M | adult | NC | 1 | 2.465753425 | 1 |
| 32 | earlydry | 3 | M | adult | C | 1 | 2.465753425 | 0 |
| 32 | earlydry | 3 | M | adult | NC | 1 | 2.465753425 | 1 |
| 32 | earlydry | 4 | M | adult | C | 1 | 2.465753425 | 0 |
| 32 | earlydry | 4 | M | adult | NC | 1 | 2.465753425 | 1 |
| 32 | earlydry | 5 | M | adult | C | 1 | 2.465753425 | 0 |
| 32 | earlydry | 5 | M | adult | NC | 1 | 2.465753425 | 1 |
| 32 | earlydry | 6 | M | adult | C | 0 | 2.465753425 | NA |
| 32 | earlydry | 6 | M | adult | NC | 0 | 2.465753425 | NA |
| 32 | earlydry | 7 | M | adult | C | 1 | 2.465753425 | 0 |
| 32 | earlydry | 7 | M | adult | NC | 1 | 2.465753425 | 1 |
| 32 | earlydry | 8 | M | adult | C | 1 | 2.465753425 | 1 |
| 32 | earlydry | 8 | M | adult | NC | 1 | 2.465753425 | 0 |
| 32 | earlydry | 9 | M | adult | C | 0 | 2.465753425 | NA |
| 32 | earlydry | 9 | M | adult | NC | 1 | 2.465753425 | NA |
| 32 | latedry | 1 | M | adult | C | 0 | 2.785388128 | NA |
| 32 | latedry | 1 | M | adult | NC | 1 | 2.785388128 | NA |
| 32 | latedry | 2 | M | adult | C | 1 | 2.785388128 | 0 |
| 32 | latedry | 2 | M | adult | NC | 1 | 2.785388128 | 1 |
| 32 | latedry | 3 | M | adult | C | 1 | 2.785388128 | 0 |
| 32 | latedry | 3 | M | adult | NC | 1 | 2.785388128 | 1 |
| 32 | latedry | 4 | M | adult | C | 0 | 2.785388128 | NA |
| 32 | latedry | 4 | M | adult | NC | 1 | 2.785388128 | NA |
| 32 | latedry | 5 | M | adult | C | 1 | 2.785388128 | 0 |
| 32 | latedry | 5 | M | adult | NC | 1 | 2.785388128 | 1 |
| 32 | latedry | 6 | M | adult | C | 0 | 2.785388128 | NA |
| 32 | latedry | 6 | M | adult | NC | 1 | 2.785388128 | NA |
| 32 | latedry | 7 | M | adult | C | 0 | 2.785388128 | NA |
| 32 | latedry | 7 | M | adult | NC | 1 | 2.785388128 | NA |
| 32 | latedry | 8 | M | adult | C | 0 | 2.785388128 | NA |
| 32 | latedry | 8 | M | adult | NC | 1 | 2.785388128 | NA |
| 32 | latedry | 9 | M | adult | C | 0 | 2.785388128 | NA |
| 32 | latedry | 9 | M | adult | NC | 1 | 2.785388128 | NA |
| 33 | earlydry | 1 | F | adult | C | 0 | 3.269230769 | NA |
| 33 | earlydry | 1 | F | adult | NC | 1 | 3.269230769 | NA |
| 33 | earlydry | 2 | F | adult | C | 1 | 3.269230769 | 1 |
| 33 | earlydry | 2 | F | adult | NC | 1 | 3.269230769 | 0 |
| 33 | earlydry | 3 | F | adult | C | 0 | 3.269230769 | NA |
| 33 | earlydry | 3 | F | adult | NC | 1 | 3.269230769 | NA |
| 33 | earlydry | 4 | F | adult | C | 0 | 3.269230769 | NA |
| 33 | earlydry | 4 | F | adult | NC | 1 | 3.269230769 | NA |
| 33 | earlydry | 5 | F | adult | C | 0 | 3.269230769 | NA |
| 33 | earlydry | 5 | F | adult | NC | 1 | 3.269230769 | NA |
| 33 | earlydry | 6 | F | adult | C | 1 | 3.269230769 | 0 |
| 33 | earlydry | 6 | F | adult | NC | 1 | 3.269230769 | 1 |
| 33 | earlydry | 7 | F | adult | C | 1 | 3.269230769 | 0 |
| 33 | earlydry | 7 | F | adult | NC | 1 | 3.269230769 | 1 |
| 33 | earlydry | 8 | F | adult | C | 0 | 3.269230769 | NA |
| 33 | earlydry | 8 | F | adult | NC | 1 | 3.269230769 | NA |
| 33 | earlydry | 9 | F | adult | C | 0 | 3.269230769 | NA |
| 33 | earlydry | 9 | F | adult | NC | 1 | 3.269230769 | NA |
| 34 | latedry | 1 | F | adult | C | 0 | 4.239631336 | NA |
| 34 | latedry | 1 | F | adult | NC | 0 | 4.239631336 | NA |
| 34 | latedry | 2 | F | adult | C | 0 | 4.239631336 | NA |
| 34 | latedry | 2 | F | adult | NC | 1 | 4.239631336 | NA |
| 34 | latedry | 3 | F | adult | C | 0 | 4.239631336 | NA |
| 34 | latedry | 3 | F | adult | NC | 1 | 4.239631336 | NA |
| 34 | latedry | 4 | F | adult | C | 0 | 4.239631336 | NA |
| 34 | latedry | 4 | F | adult | NC | 1 | 4.239631336 | NA |
| 34 | latedry | 5 | F | adult | C | 0 | 4.239631336 | NA |
| 34 | latedry | 5 | F | adult | NC | 1 | 4.239631336 | NA |
| 34 | latedry | 6 | F | adult | C | 0 | 4.239631336 | NA |
| 34 | latedry | 6 | F | adult | NC | 1 | 4.239631336 | NA |
| 34 | latedry | 7 | F | adult | C | 0 | 4.239631336 | NA |
| 34 | latedry | 7 | F | adult | NC | 1 | 4.239631336 | NA |
| 34 | latedry | 8 | F | adult | C | 0 | 4.239631336 | NA |
| 34 | latedry | 8 | F | adult | NC | 1 | 4.239631336 | NA |
| 34 | latedry | 9 | F | adult | C | 0 | 4.239631336 | NA |
| 34 | latedry | 9 | F | adult | NC | 1 | 4.239631336 | NA |
| 35 | latedry | 1 | M | juvenile | C | 1 | 2.962962963 | 1 |
| 35 | latedry | 1 | M | juvenile | NC | 1 | 2.962962963 | 0 |
| 35 | latedry | 2 | M | juvenile | C | 1 | 2.962962963 | 1 |
| 35 | latedry | 2 | M | juvenile | NC | 1 | 2.962962963 | 0 |
| 35 | latedry | 3 | M | juvenile | C | 1 | 2.962962963 | 1 |
| 35 | latedry | 3 | M | juvenile | NC | 1 | 2.962962963 | 0 |
| 35 | latedry | 4 | M | juvenile | C | 1 | 2.962962963 | 0 |
| 35 | latedry | 4 | M | juvenile | NC | 1 | 2.962962963 | 1 |
| 35 | latedry | 5 | M | juvenile | C | 1 | 2.962962963 | 0 |
| 35 | latedry | 5 | M | juvenile | NC | 1 | 2.962962963 | 1 |
| 35 | latedry | 6 | M | juvenile | C | 1 | 2.962962963 | 0 |
| 35 | latedry | 6 | M | juvenile | NC | 1 | 2.962962963 | 1 |
| 35 | latedry | 7 | M | juvenile | C | 1 | 2.962962963 | 1 |
| 35 | latedry | 7 | M | juvenile | NC | 1 | 2.962962963 | 0 |
| 35 | latedry | 8 | M | juvenile | C | 1 | 2.962962963 | 1 |
| 35 | latedry | 8 | M | juvenile | NC | 1 | 2.962962963 | 0 |
| 35 | latedry | 9 | M | juvenile | C | 1 | 2.962962963 | 1 |
| 35 | latedry | 9 | M | juvenile | NC | 1 | 2.962962963 | 0 |
| 36 | earlydry | 1 | M | juvenile | C | 1 | 2.476190476 | 0 |
| 36 | earlydry | 1 | M | juvenile | NC | 1 | 2.476190476 | 1 |
| 36 | earlydry | 2 | M | juvenile | C | 1 | 2.476190476 | 0 |
| 36 | earlydry | 2 | M | juvenile | NC | 1 | 2.476190476 | 1 |
| 36 | earlydry | 3 | M | juvenile | C | 0 | 2.476190476 | NA |
| 36 | earlydry | 3 | M | juvenile | NC | 1 | 2.476190476 | NA |
| 36 | earlydry | 4 | M | juvenile | C | 1 | 2.476190476 | 1 |
| 36 | earlydry | 4 | M | juvenile | NC | 1 | 2.476190476 | 0 |
| 36 | earlydry | 5 | M | juvenile | C | 1 | 2.476190476 | 1 |
| 36 | earlydry | 5 | M | juvenile | NC | 1 | 2.476190476 | 0 |
| 36 | earlydry | 6 | M | juvenile | C | 0 | 2.476190476 | NA |
| 36 | earlydry | 6 | M | juvenile | NC | 1 | 2.476190476 | NA |
| 36 | earlydry | 7 | M | juvenile | C | 1 | 2.476190476 | 0 |
| 36 | earlydry | 7 | M | juvenile | NC | 1 | 2.476190476 | 1 |
| 36 | earlydry | 8 | M | juvenile | C | 1 | 2.476190476 | 1 |
| 36 | earlydry | 8 | M | juvenile | NC | 1 | 2.476190476 | 0 |
| 36 | earlydry | 9 | M | juvenile | C | 0 | 2.476190476 | NA |
| 36 | earlydry | 9 | M | juvenile | NC | 1 | 2.476190476 | NA |
| 37 | earlydry | 1 | F | juvenile | C | 1 | 2.12962963 | 0 |
| 37 | earlydry | 1 | F | juvenile | NC | 1 | 2.12962963 | 1 |
| 37 | earlydry | 2 | F | juvenile | C | 1 | 2.12962963 | 0 |
| 37 | earlydry | 2 | F | juvenile | NC | 1 | 2.12962963 | 1 |
| 37 | earlydry | 3 | F | juvenile | C | 1 | 2.12962963 | 0 |
| 37 | earlydry | 3 | F | juvenile | NC | 1 | 2.12962963 | 1 |
| 37 | earlydry | 4 | F | juvenile | C | 1 | 2.12962963 | 0 |
| 37 | earlydry | 4 | F | juvenile | NC | 1 | 2.12962963 | 1 |
| 37 | earlydry | 5 | F | juvenile | C | 1 | 2.12962963 | 0 |
| 37 | earlydry | 5 | F | juvenile | NC | 1 | 2.12962963 | 1 |
| 37 | earlydry | 6 | F | juvenile | C | 1 | 2.12962963 | 0 |
| 37 | earlydry | 6 | F | juvenile | NC | 1 | 2.12962963 | 1 |
| 37 | earlydry | 7 | F | juvenile | C | 1 | 2.12962963 | 0 |
| 37 | earlydry | 7 | F | juvenile | NC | 1 | 2.12962963 | 1 |
| 37 | earlydry | 8 | F | juvenile | C | 1 | 2.12962963 | 0 |
| 37 | earlydry | 8 | F | juvenile | NC | 1 | 2.12962963 | 1 |
| 37 | earlydry | 9 | F | juvenile | C | 1 | 2.12962963 | 0 |
| 37 | earlydry | 9 | F | juvenile | NC | 1 | 2.12962963 | 1 |
| 37 | latedry | 1 | F | juvenile | C | 1 | 2.5 | 1 |
| 37 | latedry | 1 | F | juvenile | NC | 1 | 2.5 | 0 |
| 37 | latedry | 2 | F | juvenile | C | 0 | 2.5 | NA |
| 37 | latedry | 2 | F | juvenile | NC | 1 | 2.5 | NA |
| 37 | latedry | 3 | F | juvenile | C | 1 | 2.5 | 0 |
| 37 | latedry | 3 | F | juvenile | NC | 1 | 2.5 | 1 |
| 37 | latedry | 4 | F | juvenile | C | 1 | 2.5 | 0 |
| 37 | latedry | 4 | F | juvenile | NC | 1 | 2.5 | 1 |
| 37 | latedry | 5 | F | juvenile | C | 1 | 2.5 | 0 |
| 37 | latedry | 5 | F | juvenile | NC | 1 | 2.5 | 1 |
| 37 | latedry | 6 | F | juvenile | C | 0 | 2.5 | NA |
| 37 | latedry | 6 | F | juvenile | NC | 1 | 2.5 | NA |
| 37 | latedry | 7 | F | juvenile | C | 0 | 2.5 | NA |
| 37 | latedry | 7 | F | juvenile | NC | 1 | 2.5 | NA |
| 37 | latedry | 8 | F | juvenile | C | 1 | 2.5 | NA |
| 37 | latedry | 8 | F | juvenile | NC | 0 | 2.5 | NA |
| 37 | latedry | 9 | F | juvenile | C | 1 | 2.5 | 0 |
| 37 | latedry | 9 | F | juvenile | NC | 1 | 2.5 | 1 |
| 38 | earlydry | 1 | M | juvenile | C | 0 | 2.211055276 | NA |
| 38 | earlydry | 1 | M | juvenile | NC | 1 | 2.211055276 | NA |
| 38 | earlydry | 2 | M | juvenile | C | 0 | 2.211055276 | NA |
| 38 | earlydry | 2 | M | juvenile | NC | 1 | 2.211055276 | NA |
| 38 | earlydry | 3 | M | juvenile | C | 0 | 2.211055276 | NA |
| 38 | earlydry | 3 | M | juvenile | NC | 1 | 2.211055276 | NA |
| 38 | earlydry | 4 | M | juvenile | C | 0 | 2.211055276 | NA |
| 38 | earlydry | 4 | M | juvenile | NC | 1 | 2.211055276 | NA |
| 38 | earlydry | 5 | M | juvenile | C | 0 | 2.211055276 | NA |
| 38 | earlydry | 5 | M | juvenile | NC | 1 | 2.211055276 | NA |
| 38 | earlydry | 6 | M | juvenile | C | 0 | 2.211055276 | NA |
| 38 | earlydry | 6 | M | juvenile | NC | 1 | 2.211055276 | NA |
| 38 | earlydry | 7 | M | juvenile | C | 1 | 2.211055276 | 0 |
| 38 | earlydry | 7 | M | juvenile | NC | 1 | 2.211055276 | 1 |
| 38 | earlydry | 8 | M | juvenile | C | 0 | 2.211055276 | NA |
| 38 | earlydry | 8 | M | juvenile | NC | 1 | 2.211055276 | NA |
| 38 | earlydry | 9 | M | juvenile | C | 0 | 2.211055276 | NA |
| 38 | earlydry | 9 | M | juvenile | NC | 1 | 2.211055276 | NA |
| 39 | earlydry | 1 | M | juvenile | C | 1 | 2.095238095 | 1 |
| 39 | earlydry | 1 | M | juvenile | NC | 1 | 2.095238095 | 0 |
| 39 | earlydry | 2 | M | juvenile | C | 1 | 2.095238095 | 1 |
| 39 | earlydry | 2 | M | juvenile | NC | 1 | 2.095238095 | 0 |
| 39 | earlydry | 3 | M | juvenile | C | 0 | 2.095238095 | NA |
| 39 | earlydry | 3 | M | juvenile | NC | 1 | 2.095238095 | NA |
| 39 | earlydry | 4 | M | juvenile | C | 1 | 2.095238095 | 1 |
| 39 | earlydry | 4 | M | juvenile | NC | 1 | 2.095238095 | 0 |
| 39 | earlydry | 5 | M | juvenile | C | 1 | 2.095238095 | 0 |
| 39 | earlydry | 5 | M | juvenile | NC | 1 | 2.095238095 | 1 |
| 39 | earlydry | 6 | M | juvenile | C | 0 | 2.095238095 | NA |
| 39 | earlydry | 6 | M | juvenile | NC | 1 | 2.095238095 | NA |
| 39 | earlydry | 7 | M | juvenile | C | 1 | 2.095238095 | 1 |
| 39 | earlydry | 7 | M | juvenile | NC | 1 | 2.095238095 | 0 |
| 39 | earlydry | 8 | M | juvenile | C | 1 | 2.095238095 | 1 |
| 39 | earlydry | 8 | M | juvenile | NC | 1 | 2.095238095 | 0 |
| 39 | earlydry | 9 | M | juvenile | C | 0 | 2.095238095 | NA |
| 39 | earlydry | 9 | M | juvenile | NC | 1 | 2.095238095 | NA |
| 40 | earlydry | 1 | M | juvenile | C | 1 | 2.293577982 | 1 |
| 40 | earlydry | 1 | M | juvenile | NC | 1 | 2.293577982 | 0 |
| 40 | earlydry | 2 | M | juvenile | C | 1 | 2.293577982 | 0 |
| 40 | earlydry | 2 | M | juvenile | NC | 1 | 2.293577982 | 1 |
| 40 | earlydry | 3 | M | juvenile | C | 1 | 2.293577982 | 0 |
| 40 | earlydry | 3 | M | juvenile | NC | 1 | 2.293577982 | 1 |
| 40 | earlydry | 4 | M | juvenile | C | 1 | 2.293577982 | 1 |
| 40 | earlydry | 4 | M | juvenile | NC | 1 | 2.293577982 | 0 |
| 40 | earlydry | 5 | M | juvenile | C | 1 | 2.293577982 | 1 |
| 40 | earlydry | 5 | M | juvenile | NC | 1 | 2.293577982 | 0 |
| 40 | earlydry | 6 | M | juvenile | C | 1 | 2.293577982 | 1 |
| 40 | earlydry | 6 | M | juvenile | NC | 1 | 2.293577982 | 0 |
| 40 | earlydry | 7 | M | juvenile | C | 1 | 2.293577982 | 1 |
| 40 | earlydry | 7 | M | juvenile | NC | 1 | 2.293577982 | 0 |
| 40 | earlydry | 8 | M | juvenile | C | 1 | 2.293577982 | 0 |
| 40 | earlydry | 8 | M | juvenile | NC | 1 | 2.293577982 | 1 |
| 40 | earlydry | 9 | M | juvenile | C | 1 | 2.293577982 | 1 |
| 40 | earlydry | 9 | M | juvenile | NC | 1 | 2.293577982 | 0 |
| 40 | latedry | 1 | M | juvenile | C | 1 | 2.981651376 | 1 |
| 40 | latedry | 1 | M | juvenile | NC | 1 | 2.981651376 | 0 |
| 40 | latedry | 2 | M | juvenile | C | 1 | 2.981651376 | 1 |
| 40 | latedry | 2 | M | juvenile | NC | 1 | 2.981651376 | 0 |
| 40 | latedry | 3 | M | juvenile | C | 1 | 2.981651376 | 1 |
| 40 | latedry | 3 | M | juvenile | NC | 1 | 2.981651376 | 0 |
| 40 | latedry | 4 | M | juvenile | C | 1 | 2.981651376 | 0 |
| 40 | latedry | 4 | M | juvenile | NC | 1 | 2.981651376 | 1 |
| 40 | latedry | 5 | M | juvenile | C | 1 | 2.981651376 | 0 |
| 40 | latedry | 5 | M | juvenile | NC | 1 | 2.981651376 | 1 |
| 40 | latedry | 6 | M | juvenile | C | 1 | 2.981651376 | 1 |
| 40 | latedry | 6 | M | juvenile | NC | 1 | 2.981651376 | 0 |
| 40 | latedry | 7 | M | juvenile | C | 1 | 2.981651376 | 1 |
| 40 | latedry | 7 | M | juvenile | NC | 1 | 2.981651376 | 0 |
| 40 | latedry | 8 | M | juvenile | C | 1 | 2.981651376 | 1 |
| 40 | latedry | 8 | M | juvenile | NC | 1 | 2.981651376 | 0 |
| 40 | latedry | 9 | M | juvenile | C | 1 | 2.981651376 | 1 |
| 40 | latedry | 9 | M | juvenile | NC | 1 | 2.981651376 | 0 |
| 41 | earlydry | 1 | F | juvenile | C | 1 | 2.222222222 | 0 |
| 41 | earlydry | 1 | F | juvenile | NC | 1 | 2.222222222 | 1 |
| 41 | earlydry | 2 | F | juvenile | C | 0 | 2.222222222 | NA |
| 41 | earlydry | 2 | F | juvenile | NC | 0 | 2.222222222 | NA |
| 41 | earlydry | 3 | F | juvenile | C | 1 | 2.222222222 | 0 |
| 41 | earlydry | 3 | F | juvenile | NC | 1 | 2.222222222 | 1 |
| 41 | earlydry | 4 | F | juvenile | C | 0 | 2.222222222 | NA |
| 41 | earlydry | 4 | F | juvenile | NC | 1 | 2.222222222 | NA |
| 41 | earlydry | 5 | F | juvenile | C | 0 | 2.222222222 | NA |
| 41 | earlydry | 5 | F | juvenile | NC | 1 | 2.222222222 | NA |
| 41 | earlydry | 6 | F | juvenile | C | 1 | 2.222222222 | 0 |
| 41 | earlydry | 6 | F | juvenile | NC | 1 | 2.222222222 | 1 |
| 41 | earlydry | 7 | F | juvenile | C | 1 | 2.222222222 | NA |
| 41 | earlydry | 7 | F | juvenile | NC | 0 | 2.222222222 | NA |
| 41 | earlydry | 8 | F | juvenile | C | 1 | 2.222222222 | 0 |
| 41 | earlydry | 8 | F | juvenile | NC | 1 | 2.222222222 | 1 |
| 41 | earlydry | 9 | F | juvenile | C | 1 | 2.222222222 | 0 |
| 41 | earlydry | 9 | F | juvenile | NC | 1 | 2.222222222 | 1 |
| 41 | latedry | 1 | F | juvenile | C | 0 | 3.240740741 | NA |
| 41 | latedry | 1 | F | juvenile | NC | 1 | 3.240740741 | NA |
| 41 | latedry | 2 | F | juvenile | C | 0 | 3.240740741 | NA |
| 41 | latedry | 2 | F | juvenile | NC | 1 | 3.240740741 | NA |
| 41 | latedry | 3 | F | juvenile | C | 0 | 3.240740741 | NA |
| 41 | latedry | 3 | F | juvenile | NC | 1 | 3.240740741 | NA |
| 41 | latedry | 4 | F | juvenile | C | 1 | 3.240740741 | 0 |
| 41 | latedry | 4 | F | juvenile | NC | 1 | 3.240740741 | 1 |
| 41 | latedry | 5 | F | juvenile | C | 0 | 3.240740741 | NA |
| 41 | latedry | 5 | F | juvenile | NC | 1 | 3.240740741 | NA |
| 41 | latedry | 6 | F | juvenile | C | 0 | 3.240740741 | NA |
| 41 | latedry | 6 | F | juvenile | NC | 1 | 3.240740741 | NA |
| 41 | latedry | 7 | F | juvenile | C | 0 | 3.240740741 | NA |
| 41 | latedry | 7 | F | juvenile | NC | 1 | 3.240740741 | NA |
| 41 | latedry | 8 | F | juvenile | C | 0 | 3.240740741 | NA |
| 41 | latedry | 8 | F | juvenile | NC | 1 | 3.240740741 | NA |
| 41 | latedry | 9 | F | juvenile | C | 0 | 3.240740741 | NA |
| 41 | latedry | 9 | F | juvenile | NC | 1 | 3.240740741 | NA |
| 42 | latedry | 1 | M | juvenile | C | 1 | 3.01369863 | 1 |
| 42 | latedry | 1 | M | juvenile | NC | 1 | 3.01369863 | 0 |
| 42 | latedry | 2 | M | juvenile | C | 1 | 3.01369863 | 0 |
| 42 | latedry | 2 | M | juvenile | NC | 1 | 3.01369863 | 1 |
| 42 | latedry | 3 | M | juvenile | C | 1 | 3.01369863 | 1 |
| 42 | latedry | 3 | M | juvenile | NC | 1 | 3.01369863 | 0 |
| 42 | latedry | 4 | M | juvenile | C | 1 | 3.01369863 | 0 |
| 42 | latedry | 4 | M | juvenile | NC | 1 | 3.01369863 | 1 |
| 42 | latedry | 5 | M | juvenile | C | 1 | 3.01369863 | 0 |
| 42 | latedry | 5 | M | juvenile | NC | 1 | 3.01369863 | 1 |
| 42 | latedry | 6 | M | juvenile | C | 1 | 3.01369863 | 0 |
| 42 | latedry | 6 | M | juvenile | NC | 1 | 3.01369863 | 1 |
| 42 | latedry | 7 | M | juvenile | C | 1 | 3.01369863 | 0 |
| 42 | latedry | 7 | M | juvenile | NC | 1 | 3.01369863 | 1 |
| 42 | latedry | 8 | M | juvenile | C | 1 | 3.01369863 | 0 |
| 42 | latedry | 8 | M | juvenile | NC | 1 | 3.01369863 | 1 |
| 42 | latedry | 9 | M | juvenile | C | 1 | 3.01369863 | 0 |
| 42 | latedry | 9 | M | juvenile | NC | 1 | 3.01369863 | 1 |
| 43 | latedry | 1 | F | juvenile | C | 0 | 2.748815166 | NA |
| 43 | latedry | 1 | F | juvenile | NC | 1 | 2.748815166 | NA |
| 43 | latedry | 2 | F | juvenile | C | 0 | 2.748815166 | NA |
| 43 | latedry | 2 | F | juvenile | NC | 1 | 2.748815166 | NA |
| 43 | latedry | 3 | F | juvenile | C | 0 | 2.748815166 | NA |
| 43 | latedry | 3 | F | juvenile | NC | 1 | 2.748815166 | NA |
| 43 | latedry | 4 | F | juvenile | C | 0 | 2.748815166 | NA |
| 43 | latedry | 4 | F | juvenile | NC | 1 | 2.748815166 | NA |
| 43 | latedry | 5 | F | juvenile | C | 0 | 2.748815166 | NA |
| 43 | latedry | 5 | F | juvenile | NC | 1 | 2.748815166 | NA |
| 43 | latedry | 6 | F | juvenile | C | 0 | 2.748815166 | NA |
| 43 | latedry | 6 | F | juvenile | NC | 1 | 2.748815166 | NA |
| 43 | latedry | 7 | F | juvenile | C | 0 | 2.748815166 | NA |
| 43 | latedry | 7 | F | juvenile | NC | 1 | 2.748815166 | NA |
| 43 | latedry | 8 | F | juvenile | C | 0 | 2.748815166 | NA |
| 43 | latedry | 8 | F | juvenile | NC | 1 | 2.748815166 | NA |
| 43 | latedry | 9 | F | juvenile | C | 0 | 2.748815166 | NA |
| 43 | latedry | 9 | F | juvenile | NC | 1 | 2.748815166 | NA |

For each feeding test, we indicate whether the subject ate each type of food, and whether the food was eaten first when both food items were eaten.

**Table S4. Drinking responses during drinking tests.**

| Subject | Season | Test Number | Drink more NC | Subject | Season | Test Number | Drink more NC |
| --- | --- | --- | --- | --- | --- | --- | --- |
| 1 | earlydry | 1 | 0 | 13 | earlydry | 2 | 0 |
| 1 | earlydry | 2 | NA | 13 | earlydry | 3 | NA |
| 1 | earlydry | 3 | NA | 13 | latedry | 1 | 1 |
| 2 | latedry | 1 | 1 | 13 | latedry | 2 | NA |
| 2 | latedry | 2 | 0 | 13 | latedry | 3 | NA |
| 2 | latedry | 3 | 1 | 14 | earlydry | 1 | 1 |
| 3 | latedry | 1 | 0 | 14 | earlydry | 2 | 1 |
| 3 | latedry | 2 | 1 | 14 | earlydry | 3 | NA |
| 3 | latedry | 3 | 0 | 15 | earlydry | 1 | 1 |
| 4 | latedry | 1 | 0 | 15 | earlydry | 2 | 0 |
| 4 | latedry | 2 | NA | 15 | earlydry | 3 | 1 |
| 4 | latedry | 3 | NA | 16 | earlydry | 1 | 0 |
| 5 | latedry | 1 | 1 | 16 | earlydry | 2 | 0 |
| 5 | latedry | 2 | 0 | 16 | earlydry | 3 | 0 |
| 5 | latedry | 3 | NA | 16 | latedry | 1 | 1 |
| 6 | earlydry | 1 | 0 | 16 | latedry | 2 | 0 |
| 6 | earlydry | 2 | 1 | 16 | latedry | 3 | NA |
| 6 | earlydry | 3 | 1 | 17 | earlydry | 1 | 0 |
| 7 | earlydry | 1 | NA | 17 | earlydry | 2 | 0 |
| 7 | earlydry | 2 | 1 | 17 | earlydry | 3 | 0 |
| 7 | earlydry | 3 | NA | 17 | latedry | 1 | 0 |
| 8 | latedry | 1 | 0 | 17 | latedry | 2 | NA |
| 8 | latedry | 2 | 1 | 17 | latedry | 3 | 1 |
| 8 | latedry | 3 | 0 | 18 | earlydry | 1 | 1 |
| 9 | earlydry | 1 | 1 | 18 | earlydry | 2 | 1 |
| 9 | earlydry | 2 | NA | 18 | earlydry | 3 | 1 |
| 9 | earlydry | 3 | NA | 19 | latedry | 1 | 1 |
| 9 | latedry | 1 | 1 | 19 | latedry | 2 | 1 |
| 9 | latedry | 2 | 0 | 19 | latedry | 3 | 0 |
| 9 | latedry | 3 | 0 | 20 | latedry | 1 | 1 |
| 10 | earlydry | 1 | 0 | 20 | latedry | 2 | NA |
| 10 | earlydry | 2 | 1 | 20 | latedry | 3 | NA |
| 10 | earlydry | 3 | NA | 21 | latedry | 1 | 0 |
| 11 | earlydry | 1 | 1 | 21 | latedry | 2 | 0 |
| 11 | earlydry | 2 | 1 | 21 | latedry | 3 | 1 |
| 11 | earlydry | 3 | 0 | 22 | earlydry | 1 | 0 |
| 11 | latedry | 1 | 1 | 22 | earlydry | 2 | NA |
| 11 | latedry | 2 | 0 | 22 | earlydry | 3 | NA |
| 11 | latedry | 3 | 0 | 23 | earlydry | 1 | 0 |
| 12 | latedry | 1 | 1 | 23 | earlydry | 2 | NA |
| 12 | latedry | 2 | 1 | 23 | earlydry | 3 | 1 |
| 12 | latedry | 3 | 0 | 23 | latedry | 1 | NA |
| 13 | earlydry | 1 | 1 | 23 | latedry | 2 | 0 |
| Subject | Season | Test Number | Drink more NC | Subject | Season | Test Number | Drink more NC |
| 23 | latedry | 3 | NA | 35 | latedry | 1 | 0 |
| 24 | earlydry | 1 | 1 | 35 | latedry | 2 | NA |
| 24 | earlydry | 2 | NA | 35 | latedry | 3 | NA |
| 24 | earlydry | 3 | NA | 36 | earlydry | 1 | NA |
| 25 | earlydry | 1 | 1 | 36 | earlydry | 2 | 0 |
| 25 | earlydry | 2 | NA | 36 | earlydry | 3 | NA |
| 25 | earlydry | 3 | NA | 37 | earlydry | 1 | 1 |
| 26 | earlydry | 1 | 1 | 37 | earlydry | 2 | 0 |
| 26 | earlydry | 2 | 1 | 37 | earlydry | 3 | NA |
| 26 | earlydry | 3 | 0 | 37 | latedry | 1 | 0 |
| 27 | latedry | 1 | NA | 37 | latedry | 2 | 1 |
| 27 | latedry | 2 | NA | 37 | latedry | 3 | NA |
| 27 | latedry | 3 | 1 | 38 | earlydry | 1 | 1 |
| 28 | earlydry | 1 | 1 | 38 | earlydry | 2 | NA |
| 28 | earlydry | 2 | NA | 38 | earlydry | 3 | NA |
| 28 | earlydry | 3 | NA | 39 | earlydry | 1 | 0 |
| 29 | latedry | 1 | 1 | 39 | earlydry | 2 | 0 |
| 29 | latedry | 2 | 0 | 39 | earlydry | 3 | NA |
| 29 | latedry | 3 | 1 | 40 | earlydry | 1 | 1 |
| 30 | earlydry | 1 | NA | 40 | earlydry | 2 | NA |
| 30 | earlydry | 2 | 1 | 40 | earlydry | 3 | NA |
| 30 | earlydry | 3 | NA | 40 | latedry | 1 | 0 |
| 30 | latedry | 1 | 1 | 40 | latedry | 2 | NA |
| 30 | latedry | 2 | 1 | 40 | latedry | 3 | NA |
| 30 | latedry | 3 | 1 | 41 | earlydry | 1 | 1 |
| 31 | earlydry | 1 | 0 | 41 | earlydry | 2 | 0 |
| 31 | earlydry | 2 | NA | 41 | earlydry | 3 | 1 |
| 31 | earlydry | 3 | NA | 41 | latedry | 1 | 1 |
| 31 | latedry | 1 | NA | 41 | latedry | 2 | 0 |
| 31 | latedry | 2 | 0 | 41 | latedry | 3 | NA |
| 31 | latedry | 3 | NA | 42 | latedry | 1 | 1 |
| 32 | earlydry | 1 | 0 | 42 | latedry | 2 | 1 |
| 32 | earlydry | 2 | NA | 42 | latedry | 3 | 0 |
| 32 | earlydry | 3 | NA | 43 | latedry | 1 | 1 |
| 32 | latedry | 1 | 1 | 43 | latedry | 2 | NA |
| 32 | latedry | 2 | 0 | 43 | latedry | 3 | NA |
| 32 | latedry | 3 | 1 |  |  |  |  |
| 33 | earlydry | 1 | 1 |  |  |  |  |
| 33 | earlydry | 2 | NA |  |  |  |  |
| 33 | earlydry | 3 | NA |  |  |  |  |
| 34 | latedry | 1 | 1 |  |  |  |  |
| 34 | latedry | 2 | NA |  |  |  |  |
| 34 | latedry | 3 | NA |  |  |  |  |

For each drinking test, we indicate whether the subject drank more NC than C water.

**Table S5. Sleeping choice during sleeping test**.

| Subject | Season | Test Number | Sleep in NC | Subject | Season | Test Number | Sleep in NC |
| --- | --- | --- | --- | --- | --- | --- | --- |
| 1 | earlydry | 1 | 0 | 13 | earlydry | 2 | 1 |
| 1 | earlydry | 2 | 1 | 13 | earlydry | 3 | 1 |
| 1 | earlydry | 3 | NA | 13 | latedry | 1 | 1 |
| 2 | latedry | 1 | 0 | 13 | latedry | 2 | 1 |
| 2 | latedry | 2 | 0 | 13 | latedry | 3 | 1 |
| 2 | latedry | 3 | 1 | 14 | earlydry | 1 | 1 |
| 3 | latedry | 1 | 0 | 14 | earlydry | 2 | 1 |
| 3 | latedry | 2 | 0 | 14 | earlydry | 3 | 1 |
| 3 | latedry | 3 | 0 | 15 | earlydry | 1 | 0 |
| 4 | latedry | 1 | 1 | 15 | earlydry | 2 | 1 |
| 4 | latedry | 2 | 1 | 15 | earlydry | 3 | 1 |
| 4 | latedry | 3 | 0 | 16 | earlydry | 1 | 0 |
| 5 | latedry | 1 | 0 | 16 | earlydry | 2 | 1 |
| 5 | latedry | 2 | 1 | 16 | earlydry | 3 | 0 |
| 5 | latedry | 3 | 0 | 16 | latedry | 1 | 1 |
| 6 | earlydry | 1 | 1 | 16 | latedry | 2 | 0 |
| 6 | earlydry | 2 | 0 | 16 | latedry | 3 | 0 |
| 6 | earlydry | 3 | 1 | 17 | earlydry | 1 | 0 |
| 7 | earlydry | 1 | 1 | 17 | earlydry | 2 | 0 |
| 7 | earlydry | 2 | 0 | 17 | earlydry | 3 | 0 |
| 7 | earlydry | 3 | 1 | 17 | latedry | 1 | 1 |
| 8 | latedry | 1 | 0 | 17 | latedry | 2 | 0 |
| 8 | latedry | 2 | 0 | 17 | latedry | 3 | 0 |
| 8 | latedry | 3 | 0 | 18 | earlydry | 1 | 0 |
| 9 | earlydry | 1 | 0 | 18 | earlydry | 2 | 1 |
| 9 | earlydry | 2 | 0 | 18 | earlydry | 3 | 1 |
| 9 | earlydry | 3 | 1 | 19 | latedry | 1 | 1 |
| 9 | latedry | 1 | 0 | 19 | latedry | 2 | 1 |
| 9 | latedry | 2 | 0 | 19 | latedry | 3 | 1 |
| 9 | latedry | 3 | 0 | 20 | latedry | 1 | 1 |
| 10 | earlydry | 1 | 0 | 20 | latedry | 2 | 1 |
| 10 | earlydry | 2 | 1 | 20 | latedry | 3 | 1 |
| 10 | earlydry | 3 | 0 | 21 | latedry | 1 | 0 |
| 11 | earlydry | 1 | 1 | 21 | latedry | 2 | 0 |
| 11 | earlydry | 2 | 1 | 21 | latedry | 3 | 0 |
| 11 | earlydry | 3 | 0 | 22 | earlydry | 1 | 0 |
| 11 | latedry | 1 | 1 | 22 | earlydry | 2 | 0 |
| 11 | latedry | 2 | 1 | 22 | earlydry | 3 | 0 |
| 11 | latedry | 3 | 0 | 23 | earlydry | 1 | 1 |
| 12 | latedry | 1 | 1 | 23 | earlydry | 2 | 1 |
| 12 | latedry | 2 | 1 | 23 | earlydry | 3 | 0 |
| 12 | latedry | 3 | 1 | 23 | latedry | 1 | 0 |
| 13 | earlydry | 1 | 1 | 23 | latedry | 2 | 1 |
| Subject | Season | Test Number | Sleep in NC | Subject | Season | Test Number | Sleep in NC |
| 23 | latedry | 3 | 0 | 35 | latedry | 1 | 0 |
| 24 | earlydry | 1 | 1 | 35 | latedry | 2 | 0 |
| 24 | earlydry | 2 | 1 | 35 | latedry | 3 | 0 |
| 24 | earlydry | 3 | 0 | 36 | earlydry | 1 | 0 |
| 25 | earlydry | 1 | 0 | 36 | earlydry | 2 | 0 |
| 25 | earlydry | 2 | 0 | 36 | earlydry | 3 | 0 |
| 25 | earlydry | 3 | 0 | 37 | earlydry | 1 | 1 |
| 26 | earlydry | 1 | 1 | 37 | earlydry | 2 | 1 |
| 26 | earlydry | 2 | 1 | 37 | earlydry | 3 | 1 |
| 26 | earlydry | 3 | 1 | 37 | latedry | 1 | 1 |
| 27 | latedry | 1 | 1 | 37 | latedry | 2 | 1 |
| 27 | latedry | 2 | 1 | 37 | latedry | 3 | 1 |
| 27 | latedry | 3 | 1 | 38 | earlydry | 1 | 1 |
| 28 | earlydry | 1 | 1 | 38 | earlydry | 2 | 1 |
| 28 | earlydry | 2 | 1 | 38 | earlydry | 3 | 0 |
| 28 | earlydry | 3 | 1 | 39 | earlydry | 1 | 0 |
| 29 | latedry | 1 | 1 | 39 | earlydry | 2 | 0 |
| 29 | latedry | 2 | 1 | 39 | earlydry | 3 | 0 |
| 29 | latedry | 3 | 1 | 40 | earlydry | 1 | 0 |
| 30 | earlydry | 1 | 1 | 40 | earlydry | 2 | 0 |
| 30 | earlydry | 2 | 1 | 40 | earlydry | 3 | 0 |
| 30 | earlydry | 3 | 0 | 40 | latedry | 1 | 0 |
| 30 | latedry | 1 | 1 | 40 | latedry | 2 | 0 |
| 30 | latedry | 2 | 1 | 40 | latedry | 3 | 0 |
| 30 | latedry | 3 | 1 | 41 | earlydry | 1 | 1 |
| 31 | earlydry | 1 | 0 | 41 | earlydry | 2 | 1 |
| 31 | earlydry | 2 | 0 | 41 | earlydry | 3 | 1 |
| 31 | earlydry | 3 | 1 | 41 | latedry | 1 | 0 |
| 31 | latedry | 1 | 0 | 41 | latedry | 2 | 0 |
| 31 | latedry | 2 | 0 | 41 | latedry | 3 | 0 |
| 31 | latedry | 3 | 0 | 42 | latedry | 1 | NA |
| 32 | earlydry | 1 | 0 | 42 | latedry | 2 | 1 |
| 32 | earlydry | 2 | 0 | 42 | latedry | 3 | 0 |
| 32 | earlydry | 3 | 0 | 43 | latedry | 1 | 1 |
| 32 | latedry | 1 | 1 | 43 | latedry | 2 | 1 |
| 32 | latedry | 2 | 0 | 43 | latedry | 3 | 1 |
| 32 | latedry | 3 | 0 |  |  |  |  |
| 33 | earlydry | 1 | 0 |  |  |  |  |
| 33 | earlydry | 2 | 1 |  |  |  |  |
| 33 | earlydry | 3 | 1 |  |  |  |  |
| 34 | latedry | 1 | 1 |  |  |  |  |
| 34 | latedry | 2 | 1 |  |  |  |  |
| 34 | latedry | 3 | 1 |  |  |  |  |

For each sleeping test, we indicate whether the subject slept in the NC box or not.

**Table S6. Hygienic score and parasite status.**

| Subject | Season | Feeding Score | Sleeping | Drinking | Defecation | Dim.1 | Dim.2 | Richness  (fecal-oral) | Richness  (complex) |
| --- | --- | --- | --- | --- | --- | --- | --- | --- | --- |
| 1 | earlydry | 2.14 | 0.5 | 0 | selective | -0.11201 | -1.80758 | 0 | 1 |
| 2 | latedry | 2.56 | 0.33 | 0.67 | selective | 0.853046 | -0.82342 | 0 | 0 |
| 3 | latedry | 1.38 | 0 | 0.33 | non-selective | -2.12724 | 0.169791 | 1 | 2 |
| 4 | latedry | 1.67 | 0.67 | 0 | non-selective | -1.31996 | -0.33007 | 1 | 2 |
| 5 | latedry | 1.67 | 0.33 | 0.5 | non-selective | -1.18205 | 0.495267 | 2 | 1 |
| 6 | earlydry | 2.67 | 0.67 | 0.67 | selective | 1.425075 | -0.71662 | 0 | 1 |
| 7 | earlydry | 2.78 | 0.67 | 1 | non-selective | 0.945436 | 0.964144 | 1 | 0 |
| 8 | latedry | 1.44 | 0 | 0.33 | non-selective | -2.06119 | 0.125254 | 2 | 1 |
| 9 | earlydry | 1.89 | 0.33 | 1 | non-selective | -0.36642 | 1.356149 | 1 | 1 |
| 9 | latedry | 1.56 | 0 | 0.67 | non-selective | -1.55266 | 0.722928 | 1 | 1 |
| 10 | earlydry | 1.67 | 0.33 | 0.5 | non-selective | -1.18205 | 0.495267 | 1 | 2 |
| 11 | earlydry | 2 | 0.67 | 0.67 | non-selective | -0.19723 | 0.794022 | 0 | 1 |
| 11 | latedry | 1.56 | 0.67 | 0.33 | non-selective | -1.02282 | 0.410124 | 0 | 1 |
| 12 | latedry | 3 | 1 | 0.67 | selective | 2.208483 | -0.75233 | 0 | 1 |
| 13 | earlydry | 2.11 | 1 | 0.5 | selective | 1.161549 | -0.51672 | 0 | 2 |
| 13 | latedry | 1.11 | 1 | 1 | selective | 0.814592 | 1.128003 | 1 | 1 |
| 14 | earlydry | 2.33 | 1 | 1 | non-selective | 0.989016 | 1.427243 | 0 | 0 |
| 15 | earlydry | 2 | 0.67 | 0.67 | non-selective | -0.19723 | 0.794022 | 0 | 0 |
| 16 | earlydry | 1.44 | 0.33 | 0 | non-selective | -1.99768 | -0.36561 | 2 | 0 |
| 16 | latedry | 1.89 | 0.33 | 0.5 | non-selective | -0.97067 | 0.35275 | 1 | 2 |
| 17 | earlydry | 2.22 | 0 | 0 | selective | -0.73603 | -2.12558 | 0 | 1 |
| 17 | latedry | 1.6 | 0.33 | 0.5 | selective | -0.2573 | -0.54506 | 0 | 0 |
| 18 | earlydry | 1.5 | 0.67 | 1 | non-selective | -0.27 | 1.783619 | 3 | 1 |
| 19 | latedry | 1.78 | 1 | 0.67 | selective | 1.045896 | 0.031518 | 0 | 1 |
| 20 | latedry | 3 | 1 | 1 | selective | 2.611316 | -0.0834 | 0 | 0 |
| 21 | latedry | 1.89 | 0 | 0.33 | non-selective | -1.63843 | -0.15978 | 2 | 2 |
| 22 | earlydry | 2 | 0 | 0 | non-selective | -1.93557 | -0.89997 | 2 | 1 |
| 23 | earlydry | 2.89 | 0.67 | 0.5 | non-selective | 0.446875 | -0.11051 | 1 | 1 |
| 23 | latedry | 2.67 | 0.33 | 0 | selective | 0.153068 | -2.23255 | 1 | 0 |
| 24 | earlydry | 1.78 | 0.67 | 1 | non-selective | -0.00577 | 1.605472 | 0 | 1 |
| 25 | earlydry | 2.13 | 0 | 1 | selective | 0.379993 | -0.05643 | 0 | 2 |
| 26 | earlydry | 2.22 | 1 | 0.67 | selective | 1.468655 | -0.25352 | 1 | 0 |
| 27 | latedry | 3 | 1 | 1 | selective | 2.611316 | -0.0834 | 0 | 1 |
| 28 | earlydry | 2.11 | 1 | 1 | non-selective | 0.777637 | 1.569761 | 0 | 0 |
| 29 | latedry | 2.5 | 1 | 0.67 | non-selective | 0.744717 | 0.651422 | 1 | 1 |
| 30 | earlydry | 2.57 | 0.67 | 1 | selective | 1.737317 | 0.013395 | 1 | 0 |
| 30 | latedry | 2.89 | 1 | 1 | selective | 2.505627 | -0.01214 | 0 | 0 |
| 31 | earlydry | 1.44 | 0.33 | 0 | non-selective | -1.99768 | -0.36561 | 1 | 0 |
| 31 | latedry | 1.75 | 0 | 0 | non-selective | -2.17337 | -0.73964 | 0 | 1 |
| 32 | earlydry | 2 | 0 | 0 | non-selective | -1.93557 | -0.89997 | 1 | 1 |
| 32 | latedry | 1.44 | 0.33 | 0.67 | non-selective | -1.19201 | 0.972251 | 1 | 0 |
| 33 | earlydry | 2.56 | 0.67 | 1 | selective | 1.722218 | 0.023575 | 0 | 0 |
| 34 | latedry | 3 | 1 | 1 | selective | 2.611316 | -0.0834 | 1 | 1 |
| 35 | latedry | 1.33 | 0 | 0 | non-selective | -2.56971 | -0.47242 | 1 | 0 |
| 36 | earlydry | 2 | 0 | 0 | non-selective | -1.93557 | -0.89997 | 1 | 2 |
| 37 | earlydry | 2 | 1 | 0.5 | selective | 1.055859 | -0.44547 | 1 | 0 |
| 37 | latedry | 2.11 | 1 | 0.5 | selective | 1.161549 | -0.51672 | 0 | 1 |
| 38 | earlydry | 2.89 | 0.67 | 1 | selective | 2.039287 | -0.1902 | 0 | 1 |
| 39 | earlydry | 1.78 | 0 | 0 | non-selective | -2.14695 | -0.75745 | 1 | 1 |
| 40 | earlydry | 1.33 | 0 | 0.33 | non-selective | -2.16688 | 0.196513 | 1 | 0 |
| 40 | latedry | 1.22 | 0 | 1 | non-selective | -1.4669 | 1.605637 | 1 | 0 |
| 41 | earlydry | 2.13 | 1 | 0.67 | selective | 1.376177 | -0.19117 | 1 | 1 |
| 41 | latedry | 2.89 | 1 | 0.5 | selective | 1.901376 | -1.01554 | 0 | 1 |
| 42 | latedry | 1.78 | 0.5 | 0.67 | non-selective | -0.64177 | 0.847507 | 1 | 2 |
| 43 | latedry | 3 | 1 | 1 | selective | 2.611316 | -0.0834 | 0 | 0 |

For each subject after a three-day session, we indicate whether he exhibited selective defecation, its score on the two main dimension of the factorial analysis of mixed data, using the value of drinking, sleeping, defecation and feeding score. We further provide richness of fecal-orally transmitted parasites and complex-life cycle parasites.
